# Supplementary material for: Inhibition of BRD4 attenuates tumor cell self-renewal and suppresses stem cell signaling in MYC driven medulloblastoma
Source: PubMed Central journal article supplement (PMC4058011; doi:10.18632/oncotarget.1659), 2014-03-31
Supplement: oncotarget-05-2355-s001.pdf [file oncotarget-05-2355-s001.pdf]

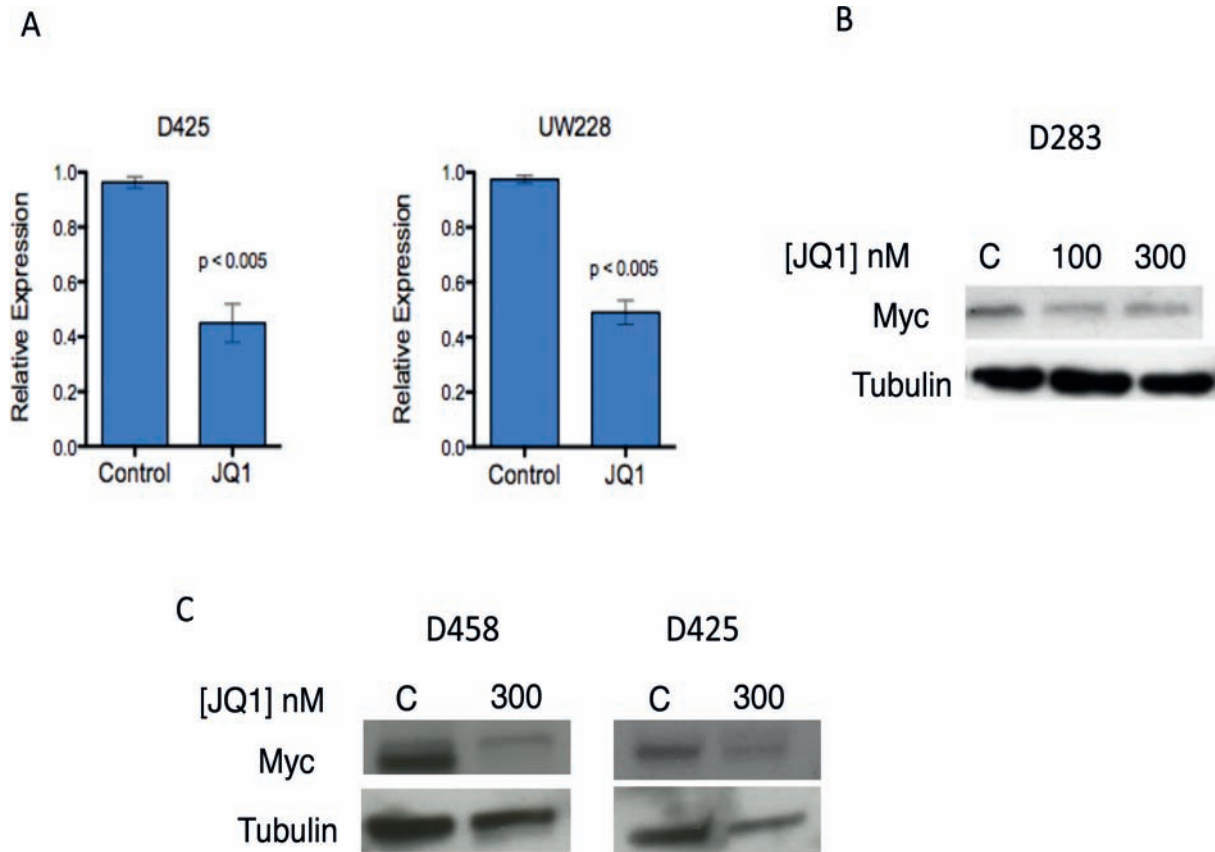

**Supplementary Figure S1: Inhibition of MYC Expression by JQ1 in medulloblastoma.** (A) Expression of c-MYC mRNA in D425 and UW228 medulloblastoma cells treated with 300nM JQ1 or control DMSO treated controls. (B) Immunoblot analysis of MYC protein in D283 cells treated with JQ1 confirms results seen in DAOY cells. (C) Immunoblot analysis of MYC protein in D458 and D425 cells treated with JQ1 confirms results seen in DAOY and D283 cells.

A

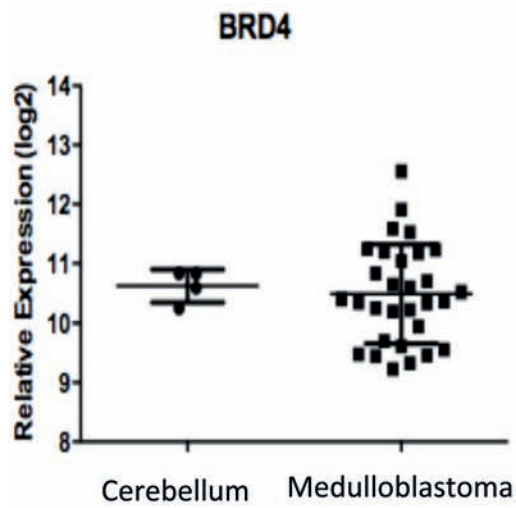

B

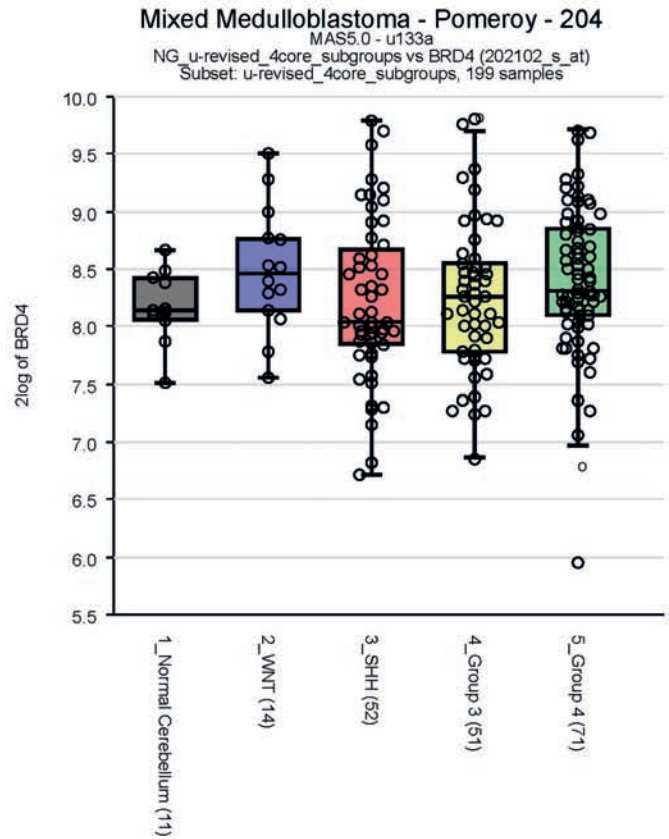

**Supplementary Figure S2: Expression of BRD4 in medulloblastoma patient samples.** (A) BRD4 mRNA expression in Colorado Patient cohort. (B) BRD4 mRNA expression by subgroup analysis in large data set from Cho et al (JCO 2012).

Myc Expression In Medulloblastoma Cell lines

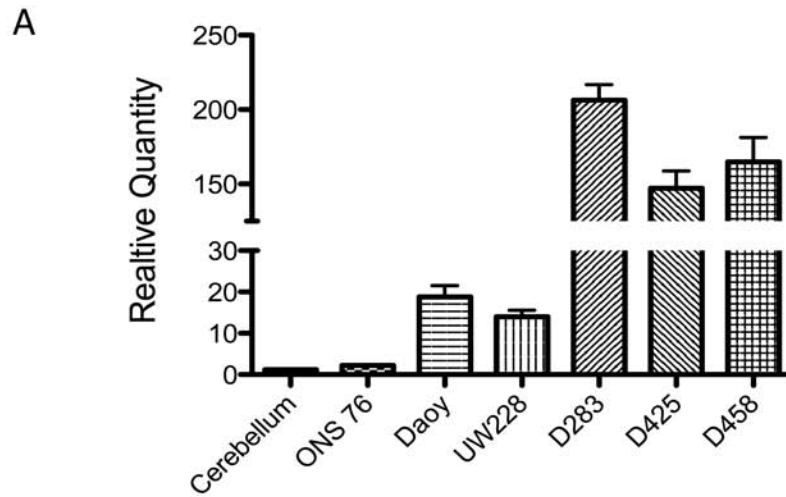

**B**

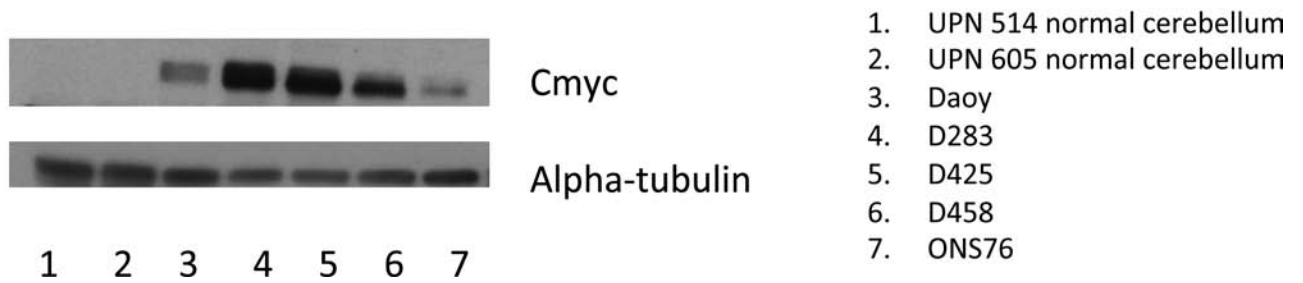

**Supplementary Figure S3:** (A) Expression of MYC mRNA in medulloblastoma cell lines used in functional studies. (B) Immunoblot analysis of MYC protein in normal cerebellum and medulloblastoma cell lines.

A

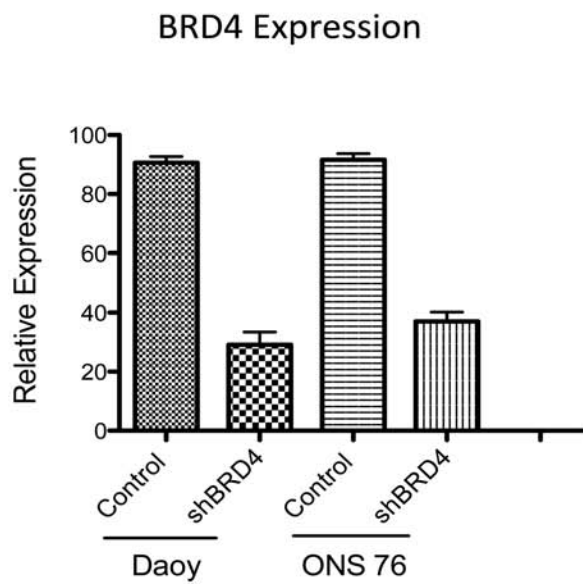

B

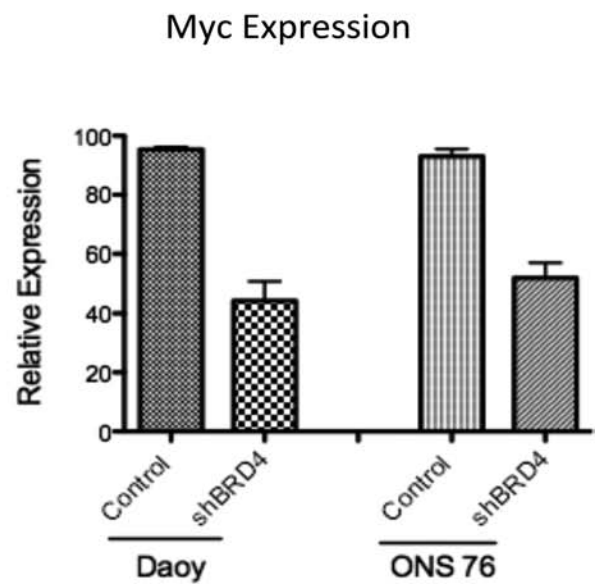

**Supplementary Figure S4: Gene expression effects of BRD4 knock down with shRNA.** (A) Expression of BRD4 mRNA in DAOY and ONS76 cells transfected with control vector or shBRD4. (B) Expression of c-MYC mRNA in DAOY and ONS76 cells transfected with control vector or shBRD4.

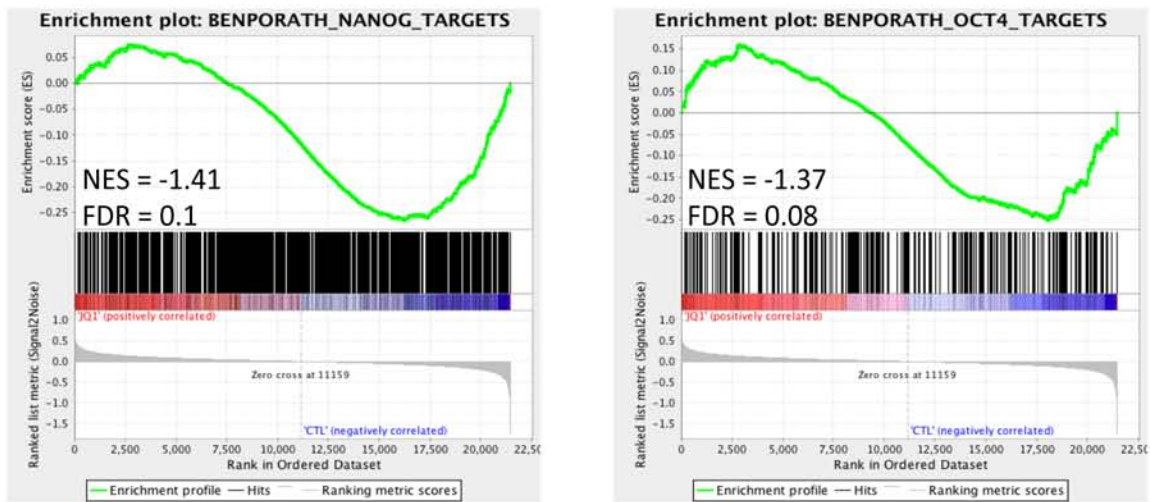

**Supplementary Figure S5: JQ1 suppresses stem cell associated signaling in medulloblastoma cells.** GSEA of Nanog and OCT4 dependent gene sets in transcriptional profiles of DAOY medulloblastoma cells treated (red) or untreated (blue) with JQ1.

A

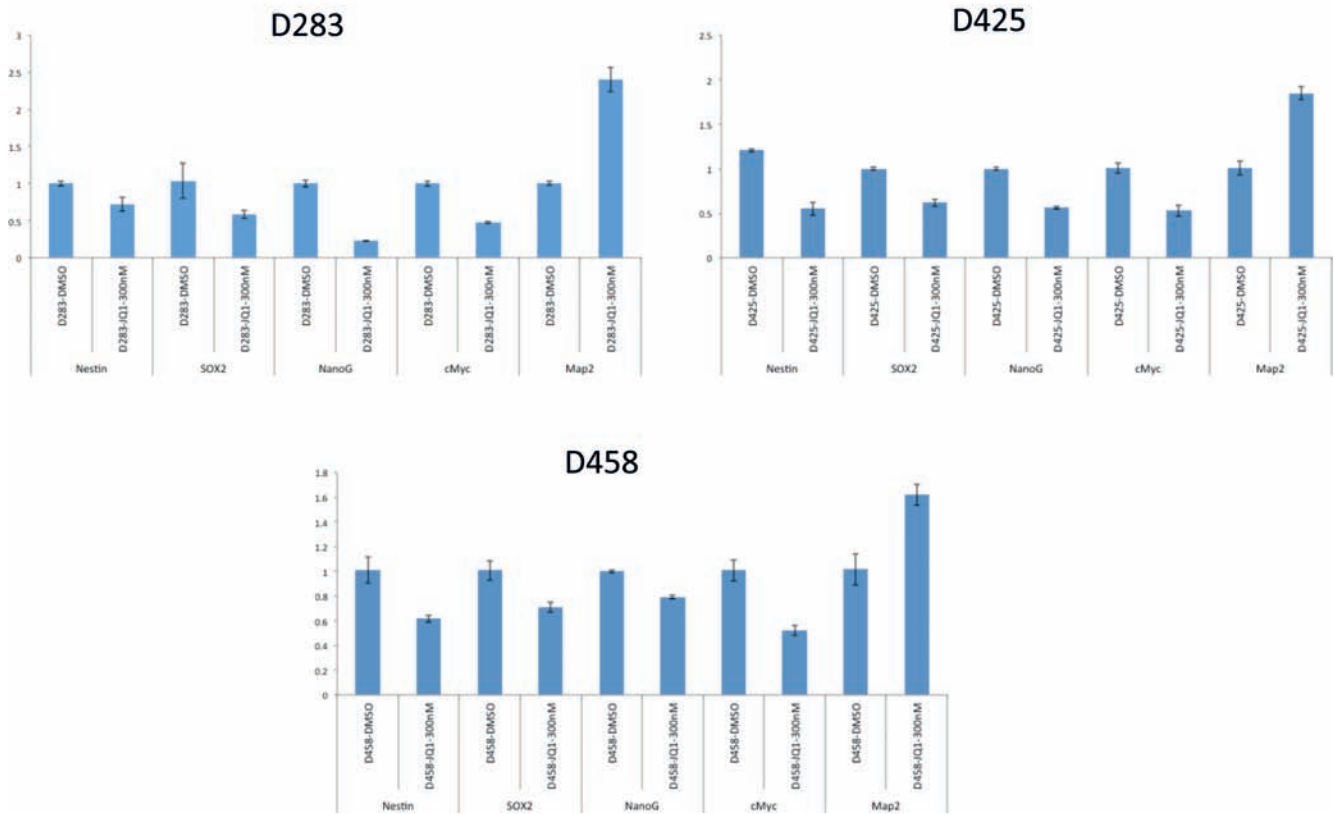

Supplementary Figure S6: Expression of stem cell associated markers (Nestin, Nanog, SOX2) and differentiation marker (MAP2) in D283, D425 and D458 medulloblastoma cells treated with 300nM JQ1 or control DMSO treated controls by qPCR analysis confirm results from DAOY cells.

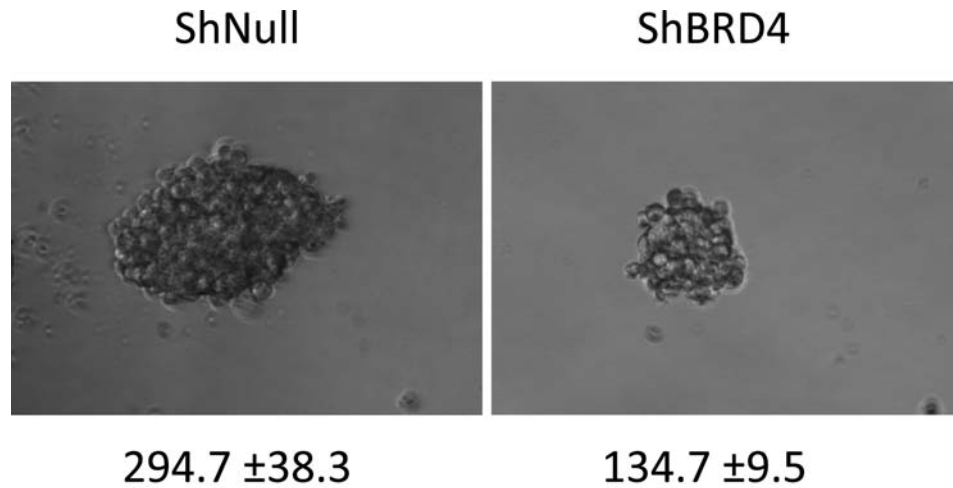

P = 0.002

Supplementary Figure S7: Genetic inhibition of BRD4 with shRNA suppresses tumor sphere formation as seen by significantly decreased sphere size (n = 3); size measured in microns.

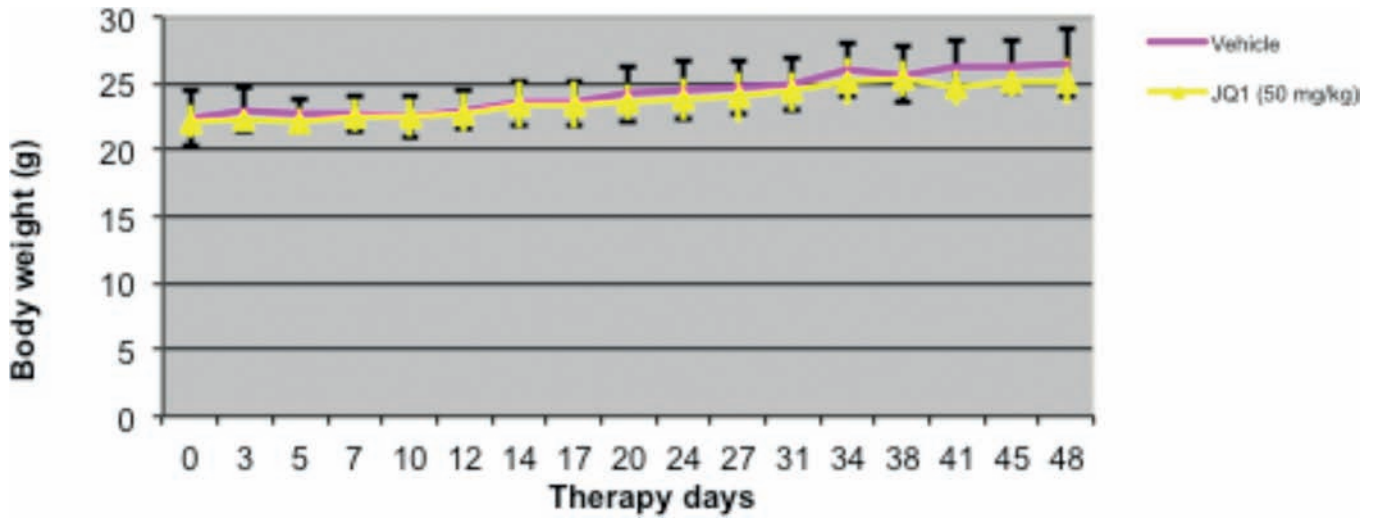

Supplementary Figure S8: Weights of control or JQ1 treated mice during *in vivo* xenograft study.

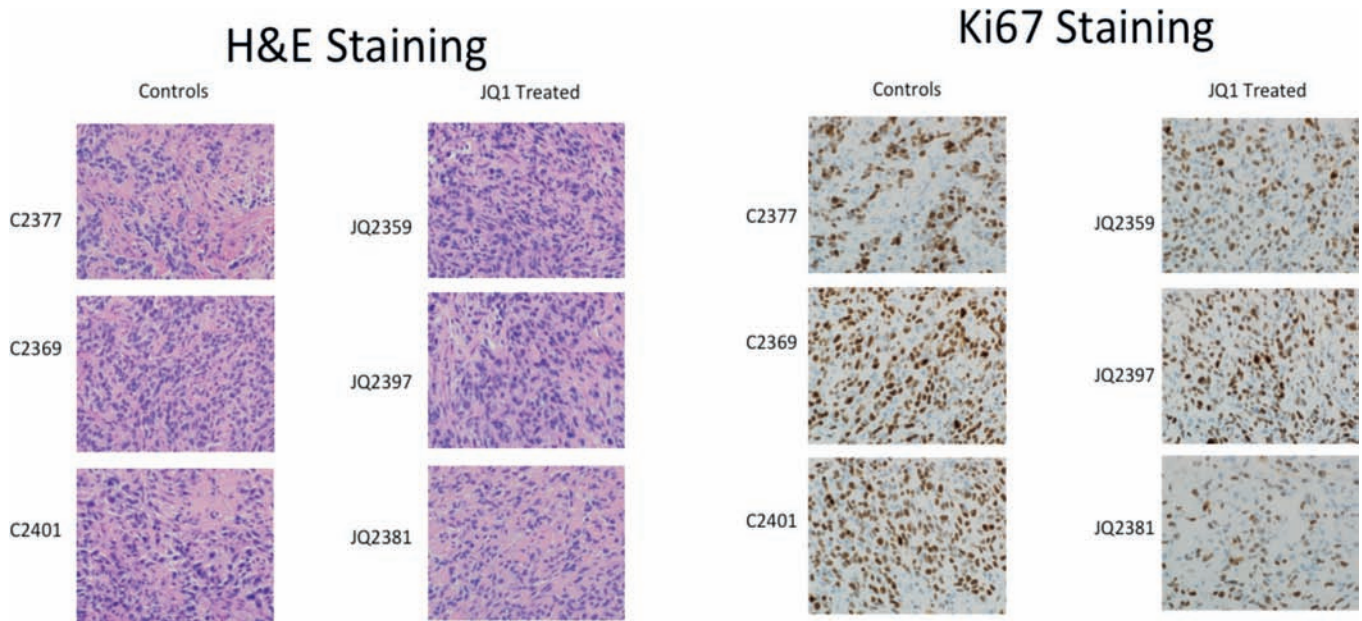

**Supplementary Figure S9: H&E staining and Ki67 IHC of all three control and all three JQ1 (300nM) treated xenografts analyzed.**



A

|        |
|--------|
| Gene   |
| IFRD1  |
| CRIP1  |
| CENPF  |
| CDC25B |
| BARD1  |
| MYBL2  |

B

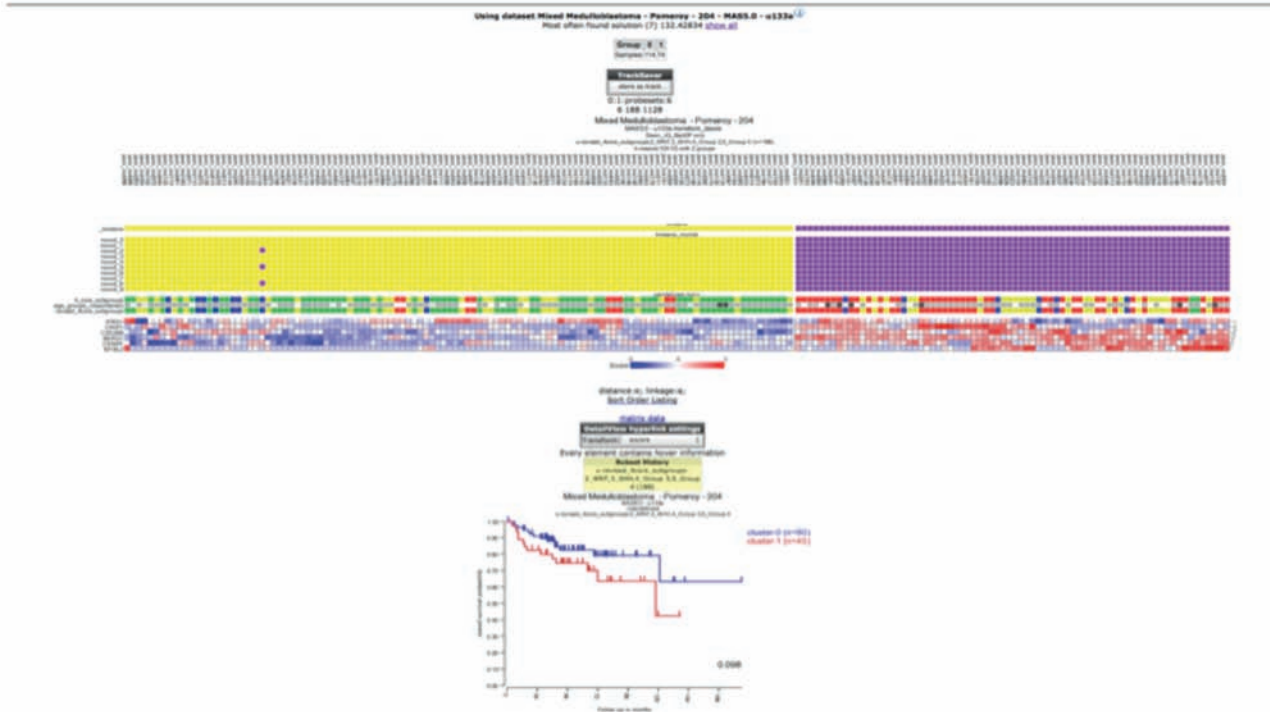

**Supplementary Figure S10:** (A) List of the six-gene signature (B) *k*-means clustering and kaplan-meir analysis of a 6 gene signature in a large cohort of medulloblastoma samples from Cho et al (2012).

**Supplementary Table S1: List of genes altered in DAOY medulloblastoma cells by 300nM JQ1.**

| GENE         | fold change (JQ1/DMSO) | p-value     | FDR         |
|--------------|------------------------|-------------|-------------|
| TRAJ17       | 0.043593696            | 0.000262429 | 0.010007579 |
| TNFSF4       | 0.086344016            | 1.68842E-05 | 0.003403309 |
| PDCD1LG2     | 0.099232052            | 2.19632E-05 | 0.003661641 |
| CCL2         | 0.101394408            | 1.89858E-07 | 0.001272452 |
| IL7R         | 0.106598324            | 2.77327E-06 | 0.002229464 |
| TRAJ23       | 0.108110858            | 0.000125047 | 0.007226592 |
| HAS2         | 0.108673594            | 7.22737E-06 | 0.002575353 |
| MIR142       | 0.116247103            | 0.000189497 | 0.008647792 |
| ACTBL2       | 0.120339041            | 0.000279241 | 0.010346969 |
| FLJ22447     | 0.12722846             | 3.12968E-07 | 0.001434447 |
| EDN1         | 0.129824388            | 5.60185E-05 | 0.004873588 |
| RHOJ         | 0.135076006            | 3.1132E-05  | 0.003974296 |
| KCNJ15       | 0.143887184            | 5.21191E-08 | 0.001272452 |
| TRBC2        | 0.150093492            | 3.3967E-05  | 0.004065425 |
| PTPN22       | 0.161227901            | 0.00049062  | 0.013786988 |
| ANXA3        | 0.166639617            | 2.61921E-05 | 0.003800098 |
| PDGFRB       | 0.174151725            | 9.10296E-05 | 0.006098098 |
| ODZ2         | 0.174359072            | 2.61772E-06 | 0.002229464 |
| TNFSF10      | 0.181949921            | 0.000233794 | 0.009450269 |
| FAM196B      | 0.187145639            | 1.1444E-05  | 0.002969775 |
| SCARA3       | 0.201646928            | 4.1664E-05  | 0.004363083 |
| NIPAL4       | 0.203432206            | 0.001091058 | 0.021714646 |
| AMTN         | 0.211075836            | 3.20918E-05 | 0.003996833 |
| GBP1         | 0.211670188            | 0.000405872 | 0.01249787  |
| LOC152225    | 0.213206501            | 2.5879E-05  | 0.003800098 |
| IL6          | 0.229587075            | 2.73522E-05 | 0.003810686 |
| SERPINB2     | 0.235455011            | 1.68649E-05 | 0.003403309 |
| MICALCL      | 0.243139579            | 3.82557E-05 | 0.004277602 |
| IGFBP5       | 0.243278377            | 3.61786E-05 | 0.004153722 |
| GPR87        | 0.244124106            | 0.000727862 | 0.017214723 |
| LOC100216001 | 0.245880631            | 0.000168042 | 0.008265971 |
| FAP          | 0.252699842            | 5.25893E-05 | 0.004771033 |
| FAM19A3      | 0.253843871            | 0.000140609 | 0.007661461 |
| VEPH1        | 0.259876845            | 9.00513E-05 | 0.006073309 |
| FAR2         | 0.263241101            | 3.16779E-06 | 0.002230648 |

(Continued)

| GENE         | fold change (JQ1/DMSO) | p-value     | FDR         |
|--------------|------------------------|-------------|-------------|
| LAMB3        | 0.266405665            | 2.07445E-05 | 0.003622055 |
| TNS3         | 0.266554664            | 3.8532E-05  | 0.004277602 |
| TLR3         | 0.268644461            | 0.000116486 | 0.007017562 |
| CD274        | 0.269802072            | 0.000505369 | 0.014003513 |
| KRT80        | 0.270417421            | 0.000233765 | 0.009450269 |
| LRRC34       | 0.270940256            | 3.9157E-06  | 0.002358967 |
| ACSL5        | 0.271944345            | 8.52209E-05 | 0.005903502 |
| TGFB2        | 0.272348029            | 5.26481E-06 | 0.002520023 |
| HHIP         | 0.273716315            | 1.20642E-05 | 0.003008587 |
| RGS4         | 0.275943218            | 0.000271614 | 0.010205415 |
| MPP4         | 0.27632283             | 9.06507E-05 | 0.006098098 |
| CSF2         | 0.277394932            | 0.002627972 | 0.03644233  |
| IL1A         | 0.281234079            | 0.000179588 | 0.008500179 |
| LOC730755    | 0.282168074            | 0.00025315  | 0.009814276 |
| LOC100509976 | 0.283443548            | 0.002840736 | 0.038067923 |
| SERTAD4      | 0.284576151            | 0.00070143  | 0.01687997  |
| HIST1H2BM    | 0.285512009            | 0.001121276 | 0.022013715 |
| HTR1D        | 0.286698581            | 5.9492E-06  | 0.002575353 |
| APOL6        | 0.28718056             | 0.000373567 | 0.012025592 |
| IL8          | 0.288078387            | 8.45857E-05 | 0.005874652 |
| ZNF532       | 0.288385393            | 1.65771E-07 | 0.001272452 |
| NNMT         | 0.289045797            | 0.002019747 | 0.030854766 |
| TEK          | 0.289904574            | 1.08406E-05 | 0.002935558 |
| NAV3         | 0.290694699            | 4.63151E-05 | 0.004592806 |
| LINC00460    | 0.292496243            | 0.000222857 | 0.00929053  |
| E2F8         | 0.293163351            | 6.95137E-05 | 0.005369556 |
| AK5          | 0.299497666            | 4.04269E-05 | 0.004347483 |
| PRDM1        | 0.300472181            | 8.65069E-05 | 0.005950367 |
| LOC100506178 | 0.301811566            | 0.001656147 | 0.027508561 |
| SERPINB7     | 0.302323843            | 0.000133252 | 0.007473402 |
| LOC100216479 | 0.303620267            | 0.000834928 | 0.01869158  |
| KCNH1        | 0.305777325            | 7.63745E-05 | 0.005567586 |
| IKBKE        | 0.307504622            | 1.05467E-05 | 0.002929961 |
| NEXN         | 0.308150421            | 6.1705E-07  | 0.001586766 |
| CTSS         | 0.311041718            | 0.00120765  | 0.022953056 |
| GPX8         | 0.313660696            | 0.000666093 | 0.016505294 |
| TNFAIP3      | 0.314109613            | 6.63811E-07 | 0.001586766 |
| F2RL3        | 0.314153161            | 0.000681851 | 0.016685899 |

| GENE         | fold change (JQ1/DMSO) | p-value     | FDR         |
|--------------|------------------------|-------------|-------------|
| ZNF474       | 0.316441342            | 2.58953E-05 | 0.003800098 |
| FMNL1        | 0.317454118            | 1.16944E-05 | 0.002969775 |
| TDO2         | 0.318906778            | 0.001123329 | 0.022045948 |
| PDE1C        | 0.319546251            | 2.12773E-05 | 0.003629837 |
| F3           | 0.320033906            | 6.37743E-06 | 0.002575353 |
| STRA6        | 0.321366177            | 1.03681E-06 | 0.001684565 |
| CLIC6        | 0.322094664            | 7.00356E-05 | 0.005369556 |
| PLK2         | 0.323291317            | 4.04711E-06 | 0.002359839 |
| PTPN7        | 0.32881925             | 0.000140749 | 0.007661461 |
| LRRC17       | 0.334228501            | 0.00010333  | 0.00656324  |
| LIF          | 0.339808379            | 2.73812E-05 | 0.003810686 |
| AIM1         | 0.3426862              | 0.000207609 | 0.009061273 |
| SH3RF2       | 0.344588549            | 6.4587E-05  | 0.005195423 |
| LOC100507503 | 0.344721535            | 0.001951989 | 0.03025724  |
| ABCC9        | 0.346746526            | 0.00028694  | 0.010499642 |
| TNFRSF9      | 0.347232366            | 0.00048062  | 0.013663522 |
| LOC541472    | 0.347929441            | 0.000102375 | 0.006559723 |
| C15orf54     | 0.349337478            | 0.00016988  | 0.008283632 |
| ANXA8L1      | 0.349596666            | 0.000120164 | 0.007142831 |
| CTHRC1       | 0.351781942            | 6.64473E-06 | 0.002575353 |
| LOC100507127 | 0.351996584            | 0.000122333 | 0.007180161 |
| GBP3         | 0.35214626             | 0.001243489 | 0.023401948 |
| TNFRSF8      | 0.353103575            | 0.00028426  | 0.010467835 |
| GDF15        | 0.354857901            | 1.95731E-05 | 0.003569561 |
| BHLHE41      | 0.355745316            | 0.000122399 | 0.007180161 |
| CDK15        | 0.356093169            | 2.64472E-06 | 0.002229464 |
| SMAGP        | 0.356450422            | 0.000676927 | 0.016618496 |
| GRIK1-AS2    | 0.357607773            | 0.001191516 | 0.022783707 |
| DCSTAMP      | 0.358000457            | 0.0005276   | 0.014374151 |
| LOC100128130 | 0.358199857            | 0.002789715 | 0.037744041 |
| FOXF2        | 0.358836861            | 4.49358E-05 | 0.004589186 |
| TGFB1I1      | 0.359932097            | 0.000149866 | 0.007901048 |
| SPOCD1       | 0.363451979            | 6.18604E-05 | 0.005079279 |
| HIC1         | 0.364517504            | 3.21559E-05 | 0.003996833 |
| ITGB6        | 0.365223964            | 0.003384701 | 0.042421111 |
| CACNA2D3     | 0.36526447             | 0.00035331  | 0.011677142 |
| ERAP2        | 0.365859933            | 7.69456E-07 | 0.001586766 |
| TMEM156      | 0.366060328            | 0.000249703 | 0.009751265 |

(Continued)

| GENE         | fold change (JQ1/DMSO) | p-value     | FDR         |
|--------------|------------------------|-------------|-------------|
| CIQTNF2      | 0.367134348            | 0.000651638 | 0.016326577 |
| FAM83B       | 0.36778724             | 0.003015565 | 0.039377874 |
| FBXL13       | 0.367931729            | 0.000796527 | 0.018150186 |
| SH2D1B       | 0.369540229            | 0.000174217 | 0.008407734 |
| WNT5A        | 0.369925502            | 2.34268E-05 | 0.003749477 |
| LOC100507600 | 0.371120603            | 0.001743609 | 0.028303689 |
| ANK3         | 0.373610438            | 0.000188493 | 0.008647792 |
| TRGV5        | 0.37564453             | 0.002250777 | 0.032972653 |
| PLAC8        | 0.375739146            | 6.71079E-05 | 0.005259719 |
| IFI44        | 0.375894575            | 7.4027E-07  | 0.001586766 |
| RAET1E       | 0.3781088              | 1.06862E-05 | 0.002935503 |
| IL24         | 0.378335135            | 0.000413338 | 0.012619675 |
| DDR2         | 0.378416439            | 0.000203811 | 0.008994373 |
| MGLL         | 0.378490764            | 3.42702E-05 | 0.004083199 |
| SORBS2       | 0.37853799             | 2.12829E-05 | 0.003629837 |
| DSC2         | 0.379973313            | 1.43868E-05 | 0.00323775  |
| LRRTM2       | 0.381009797            | 0.000518392 | 0.014224475 |
| TUBBP5       | 0.382295467            | 0.003927377 | 0.046700859 |
| ANGPTL2      | 0.384017333            | 0.000810627 | 0.018338982 |
| ANXA8        | 0.386341885            | 0.001277865 | 0.023685722 |
| CHRNA9       | 0.386664262            | 0.000132873 | 0.007473402 |
| MLKL         | 0.386785782            | 0.000408691 | 0.01255747  |
| SEMA3A       | 0.387540771            | 0.000164217 | 0.008228806 |
| SLAMF7       | 0.38913878             | 0.001429441 | 0.02531957  |
| PARP14       | 0.389440096            | 0.000117852 | 0.007060191 |
| OAS3         | 0.390057846            | 1.61707E-06 | 0.002083338 |
| POLE2        | 0.390781299            | 1.57237E-05 | 0.003303415 |
| OTOGL        | 0.391127261            | 0.000169946 | 0.008283632 |
| TNS1         | 0.391431926            | 0.000986464 | 0.020586842 |
| EMP3         | 0.393468487            | 1.9856E-06  | 0.002129238 |
| IL17RB       | 0.394403247            | 0.000927598 | 0.019911381 |
| CLMP         | 0.396039619            | 0.000234243 | 0.009450269 |
| JAG1         | 0.396084459            | 6.41918E-08 | 0.001272452 |
| LYPD1        | 0.396219924            | 0.000167256 | 0.008265971 |
| RUNX3        | 0.397146538            | 0.000359049 | 0.011745656 |
| BDKRB1       | 0.399620731            | 0.000519303 | 0.014242184 |
| TFPI         | 0.401305639            | 0.00087342  | 0.019255822 |
| VCAN         | 0.40208897             | 0.000500177 | 0.013974982 |

| GENE      | fold change (JQ1/DMSO) | p-value     | FDR         |
|-----------|------------------------|-------------|-------------|
| ZBTB2     | 0.403818805            | 6.57045E-06 | 0.002575353 |
| LAT       | 0.403911184            | 8.93034E-05 | 0.006045043 |
| LPXN      | 0.405192675            | 2.32778E-05 | 0.003745677 |
| SLC7A11   | 0.4067535              | 1.82749E-05 | 0.003510063 |
| SIRPA     | 0.407201091            | 0.000102402 | 0.006559723 |
| LRRN3     | 0.407903559            | 0.002596442 | 0.036168727 |
| GIPC3     | 0.407954455            | 1.03382E-05 | 0.002925673 |
| PHF19     | 0.408756431            | 4.6919E-06  | 0.002378207 |
| MT1A      | 0.413704723            | 1.03353E-05 | 0.002925673 |
| GRPR      | 0.414268108            | 0.003146867 | 0.040395115 |
| TMEM204   | 0.41549989             | 0.001856915 | 0.029367601 |
| ZNF618    | 0.415536372            | 5.68296E-05 | 0.004873588 |
| BRIP1     | 0.416259951            | 1.90394E-06 | 0.002083338 |
| TGM2      | 0.417804518            | 5.20748E-05 | 0.004750001 |
| SYNC      | 0.417865339            | 6.36272E-05 | 0.005155428 |
| ZPLD1     | 0.418833864            | 0.002371769 | 0.034032566 |
| TMEM154   | 0.420036518            | 1.52907E-05 | 0.003268202 |
| RAB39A    | 0.421133632            | 0.001153694 | 0.022379744 |
| PTX3      | 0.421170609            | 3.48028E-05 | 0.004083199 |
| MYO5C     | 0.42418044             | 0.000175631 | 0.008430445 |
| TM4SF1    | 0.425096809            | 3.30847E-05 | 0.004031596 |
| PHF15     | 0.425220582            | 3.32208E-05 | 0.004039001 |
| NLRP3     | 0.426556869            | 0.000567613 | 0.015014162 |
| PPAPDC1A  | 0.427362828            | 0.000213471 | 0.009163871 |
| IFI44L    | 0.427460594            | 0.000148803 | 0.007883765 |
| SNTB1     | 0.427791582            | 1.60071E-05 | 0.003326561 |
| CDA       | 0.42811986             | 0.000547093 | 0.014681424 |
| SSX4      | 0.42829003             | 0.001400262 | 0.025005798 |
| HAPLN1    | 0.429690564            | 0.000458816 | 0.013339328 |
| DHRS4L2   | 0.429861359            | 0.002328854 | 0.033701221 |
| XDH       | 0.430425861            | 0.001954921 | 0.030262224 |
| LACE1     | 0.430959241            | 6.84418E-05 | 0.005318325 |
| KLF11     | 0.431485305            | 3.21757E-05 | 0.003996833 |
| ICAM1     | 0.433248502            | 0.00017159  | 0.008341016 |
| DRP2      | 0.434883236            | 0.000502054 | 0.013986545 |
| RIN2      | 0.436950977            | 0.000320903 | 0.011115243 |
| LINC00470 | 0.437590503            | 0.003957873 | 0.046869924 |
| BRCA1     | 0.438356537            | 1.17424E-05 | 0.002969775 |

(Continued)

| GENE      | fold change (JQ1/DMSO) | p-value     | FDR         |
|-----------|------------------------|-------------|-------------|
| SCG5      | 0.438660488            | 0.001879982 | 0.029568494 |
| TMEM194B  | 0.438827751            | 8.04725E-06 | 0.002661222 |
| ATP8B1    | 0.439078257            | 3.40777E-06 | 0.002255733 |
| PIK3CG    | 0.440194594            | 6.88527E-06 | 0.002575353 |
| ST6GAL2   | 0.441057911            | 7.35207E-06 | 0.002575353 |
| BIN1      | 0.441370874            | 3.86305E-05 | 0.004277602 |
| MCTP1     | 0.44196785             | 0.000214657 | 0.009178042 |
| MYCT1     | 0.443150916            | 0.000538769 | 0.014560069 |
| SIGLEC15  | 0.443356767            | 3.19576E-05 | 0.003996833 |
| SLCO2A1   | 0.443910273            | 1.7949E-06  | 0.002083338 |
| CEP41     | 0.444329962            | 0.00032662  | 0.011182925 |
| S1PR1     | 0.446008569            | 0.000806127 | 0.018272139 |
| PRTFDC1   | 0.446376609            | 4.41548E-06 | 0.002367448 |
| SLC16A9   | 0.44664484             | 0.000413352 | 0.012619675 |
| NRG1      | 0.447008241            | 7.03931E-05 | 0.005369556 |
| XRCC4     | 0.447458772            | 0.000341387 | 0.011437601 |
| TMEM45A   | 0.447566305            | 0.000516425 | 0.014213017 |
| CDH11     | 0.447801107            | 3.33978E-06 | 0.002255733 |
| PCSK1     | 0.448663792            | 0.000509877 | 0.014091791 |
| VAMP8     | 0.449014311            | 1.3605E-05  | 0.003213477 |
| EPHX4     | 0.449063074            | 8.74326E-08 | 0.001272452 |
| WDR76     | 0.450459716            | 4.56532E-06 | 0.002376493 |
| SYNPO     | 0.450759562            | 0.00128561  | 0.023769156 |
| CSF1      | 0.450930396            | 0.000156531 | 0.008039006 |
| GINS2     | 0.452287909            | 8.28519E-06 | 0.00268001  |
| KCNH1-IT1 | 0.452353749            | 0.0038278   | 0.04594474  |
| ROS1      | 0.453339361            | 3.75798E-05 | 0.004258072 |
| CLCN4     | 0.453414783            | 0.000221298 | 0.009276327 |
| PRR16     | 0.453499647            | 8.59947E-05 | 0.005941724 |
| MYEOV     | 0.453985041            | 1.41833E-05 | 0.00323775  |
| COL6A3    | 0.454285134            | 6.51353E-05 | 0.005201687 |
| AMIGO2    | 0.454360713            | 2.04392E-05 | 0.003622055 |
| MGC11082  | 0.454961593            | 0.000245384 | 0.009685506 |
| RAMP2     | 0.455131917            | 0.00134065  | 0.024408024 |
| LCP1      | 0.455707494            | 1.79756E-05 | 0.003504171 |
| MPZL3     | 0.455728552            | 0.001562322 | 0.026702907 |
| LOC643650 | 0.45604771             | 0.002535792 | 0.03562934  |
| HIST1H2AE | 0.456219494            | 0.000460317 | 0.013362174 |

| GENE         | fold change (JQ1/DMSO) | p-value     | FDR         |
|--------------|------------------------|-------------|-------------|
| PLEKHA2      | 0.456223711            | 0.000780122 | 0.017972842 |
| BZRAP1-AS1   | 0.456324916            | 0.000522218 | 0.014285593 |
| LUM          | 0.456896723            | 0.000804589 | 0.018265964 |
| THBS1        | 0.456927338            | 3.87859E-05 | 0.004277602 |
| PCDHB7       | 0.457959948            | 0.00025408  | 0.009843213 |
| CHRD1        | 0.458206554            | 1.26684E-05 | 0.003073491 |
| GBP4         | 0.458422576            | 0.002047052 | 0.031119021 |
| RAD51AP1     | 0.458462827            | 1.16308E-06 | 0.001834143 |
| IFIT3        | 0.459502092            | 0.00016344  | 0.008205961 |
| KYNU         | 0.460119339            | 0.002917143 | 0.038679588 |
| RASSF5       | 0.460509663            | 0.000463291 | 0.013427175 |
| NFIC         | 0.460893928            | 2.5352E-05  | 0.003800098 |
| MND1         | 0.461305159            | 0.000230641 | 0.009428262 |
| SCN2A        | 0.462226966            | 0.001450836 | 0.025596491 |
| SGOL1        | 0.464314208            | 0.000340017 | 0.011422739 |
| HDAC9        | 0.46437858             | 0.000212809 | 0.009159657 |
| CDCA7        | 0.466459372            | 0.000785069 | 0.018019283 |
| TP73         | 0.467000716            | 6.232E-05   | 0.005102377 |
| CUBN         | 0.467139928            | 0.004103787 | 0.04782281  |
| ADAMTS1      | 0.468435829            | 0.000676439 | 0.016614123 |
| C1QTNF9B-AS1 | 0.468484536            | 0.000177212 | 0.00848355  |
| TMEM194A     | 0.468537578            | 4.02881E-05 | 0.004347483 |
| LY6K         | 0.468539743            | 6.03523E-05 | 0.004995458 |
| CPA4         | 0.468616611            | 1.61322E-05 | 0.003339615 |
| GLT8D2       | 0.469593171            | 0.000195462 | 0.00875434  |
| GPR183       | 0.470089274            | 7.00342E-05 | 0.005369556 |
| RGCC         | 0.470697904            | 0.003471352 | 0.043127021 |
| SCARF1       | 0.4731108              | 0.002350176 | 0.033877483 |
| FLT3LG       | 0.474474788            | 0.000451629 | 0.01322017  |
| FRMD4A       | 0.474724803            | 1.56443E-05 | 0.003303415 |
| IKZF3        | 0.475360302            | 0.003445341 | 0.042900336 |
| DCLK1        | 0.475696506            | 0.00135059  | 0.024497491 |
| NDC80        | 0.475755861            | 0.000393557 | 0.012318357 |
| PAPPA        | 0.476035147            | 0.000929698 | 0.019931075 |
| MBNL3        | 0.476148447            | 0.000182414 | 0.008512177 |
| MICAL2       | 0.47616825             | 5.38611E-07 | 0.001586766 |
| TENC1        | 0.476988592            | 0.000266233 | 0.010102346 |
| MTBP         | 0.477132986            | 4.85806E-05 | 0.004656499 |

(Continued)



| GENE         | fold change (JQ1/DMSO) | p-value     | FDR         |
|--------------|------------------------|-------------|-------------|
| CDCP1        | 0.478521837            | 5.50337E-06 | 0.002522548 |
| BIRC3        | 0.478555006            | 0.004054348 | 0.047546364 |
| TFAP4        | 0.479163526            | 0.001332468 | 0.02432514  |
| ALG14        | 0.479212241            | 8.31916E-05 | 0.005830698 |
| TSPAN2       | 0.479266498            | 0.000230884 | 0.009428262 |
| ADAMTS5      | 0.47977282             | 0.000825775 | 0.018556403 |
| DNM3OS       | 0.479932472            | 0.000395702 | 0.012363843 |
| SYK          | 0.480145424            | 0.000114865 | 0.006981504 |
| LOC149773    | 0.482158705            | 0.002685803 | 0.036893481 |
| CTTNBP2      | 0.484437796            | 0.001110571 | 0.021915894 |
| NTM          | 0.485012331            | 0.004213391 | 0.048634959 |
| MCM5         | 0.485181574            | 2.57509E-05 | 0.003800098 |
| KIF18B       | 0.485410313            | 0.000124101 | 0.007216119 |
| FAM69B       | 0.485607744            | 3.74429E-06 | 0.002307559 |
| SSX4B        | 0.48651516             | 0.000182902 | 0.008527527 |
| SPC25        | 0.487449049            | 5.61964E-05 | 0.004873588 |
| DMRT2        | 0.48786932             | 0.002720492 | 0.037100455 |
| BATF3        | 0.488036177            | 0.000115437 | 0.006996142 |
| SLC43A3      | 0.48959249             | 8.65637E-05 | 0.005950367 |
| GLIPR1       | 0.489742963            | 2.66803E-05 | 0.003800098 |
| ADCY7        | 0.489861789            | 0.001217083 | 0.023075085 |
| INHBA        | 0.489937627            | 1.87363E-05 | 0.003537268 |
| RAD51        | 0.490190127            | 0.000288864 | 0.010543241 |
| GYPE         | 0.490782825            | 0.002675887 | 0.036825727 |
| ZNF689       | 0.490931394            | 0.001671225 | 0.027639134 |
| MIR4755      | 0.491616985            | 0.001632325 | 0.027358665 |
| E2F2         | 0.491695367            | 8.19876E-05 | 0.005787141 |
| DTX3L        | 0.491868078            | 0.000272227 | 0.010206489 |
| SNORD116-21  | 0.492554977            | 0.00068467  | 0.016726941 |
| TMEM178A     | 0.492775807            | 0.002665604 | 0.036759617 |
| ALDH1B1      | 0.493223462            | 4.08884E-05 | 0.004358476 |
| DCLK2        | 0.493461693            | 0.001230348 | 0.023240599 |
| HOXD13       | 0.493467394            | 6.37904E-06 | 0.002575353 |
| ZMYND8       | 0.493854057            | 1.73314E-05 | 0.003454489 |
| SRGN         | 0.494656863            | 1.7881E-06  | 0.002083338 |
| MIR221       | 0.494842048            | 0.001503819 | 0.02617016  |
| LOC100128816 | 0.494843191            | 0.00217188  | 0.032212916 |
| CD101        | 0.495938569            | 0.002798278 | 0.037801782 |

| GENE         | fold change (JQ1/DMSO) | p-value     | FDR         |
|--------------|------------------------|-------------|-------------|
| EBI3         | 0.496257221            | 0.001766172 | 0.028540339 |
| S100A3       | 0.497046707            | 0.000160505 | 0.008134023 |
| FAM72C       | 0.498254014            | 0.001643985 | 0.027473501 |
| GPR68        | 0.4987827              | 0.00038372  | 0.012171722 |
| BORA         | 0.500673962            | 0.000391844 | 0.012293446 |
| IFIH1        | 0.501101004            | 0.002141362 | 0.031954747 |
| LMNB1        | 0.501163528            | 0.000124627 | 0.007216119 |
| TRIP6        | 0.501552745            | 1.50716E-05 | 0.003258443 |
| HMCN1        | 0.501789203            | 0.004222555 | 0.048696248 |
| LOC100190938 | 0.502036211            | 0.000346108 | 0.011519102 |
| IFITM2       | 0.502351817            | 5.00406E-05 | 0.004692392 |
| TMEM244      | 0.50249344             | 0.003763406 | 0.045344391 |
| CGB2         | 0.50421933             | 0.003357266 | 0.042195624 |
| GPR115       | 0.504687876            | 0.003362485 | 0.042241415 |
| FAM176A      | 0.504766009            | 0.000312687 | 0.010993665 |
| ALKBH8       | 0.504827824            | 3.3446E-05  | 0.004057181 |
| APOBEC3C     | 0.504867483            | 0.001266147 | 0.023555518 |
| MDFIC        | 0.504925811            | 0.000633219 | 0.016024825 |
| LOXL3        | 0.505305107            | 0.000306335 | 0.010907855 |
| SEMA6B       | 0.505578377            | 0.001016615 | 0.020884232 |
| CFI          | 0.505656648            | 0.001074287 | 0.02144674  |
| AOX1         | 0.506056369            | 0.002321692 | 0.033652922 |
| F2RL2        | 0.50671742             | 1.04485E-05 | 0.002925673 |
| BNC2         | 0.50674552             | 4.92231E-05 | 0.004662889 |
| HSD17B2      | 0.506790013            | 0.001117134 | 0.021999746 |
| SLC10A4      | 0.507507131            | 0.001243339 | 0.023401948 |
| HJURP        | 0.507644343            | 6.34875E-05 | 0.005155428 |
| NRP1         | 0.508355623            | 5.69885E-06 | 0.002522548 |
| CACNG4       | 0.508675201            | 0.00102344  | 0.020944192 |
| TXNRD2       | 0.508967932            | 0.000157283 | 0.008056377 |
| UBXN8        | 0.509030262            | 5.46039E-05 | 0.004815292 |
| C19orf40     | 0.509327905            | 0.001184534 | 0.022714956 |
| MYLK2        | 0.50960335             | 0.000800659 | 0.018197937 |
| DENND2A      | 0.509729351            | 0.001199695 | 0.022864449 |
| PDGFC        | 0.51099934             | 0.000740839 | 0.017398846 |
| ELOVL2       | 0.511533277            | 2.5619E-05  | 0.003800098 |
| GINS1        | 0.512547162            | 1.11204E-05 | 0.002963198 |
| CHD3         | 0.512925073            | 7.64262E-05 | 0.005567586 |

(Continued)

| GENE         | fold change (JQ1/DMSO) | p-value     | FDR         |
|--------------|------------------------|-------------|-------------|
| SFXN2        | 0.512978405            | 0.000228016 | 0.009368225 |
| UBE2C        | 0.512983146            | 2.77675E-06 | 0.002229464 |
| CFLAR        | 0.514242232            | 5.80093E-05 | 0.00493696  |
| NRK          | 0.515121026            | 0.002963727 | 0.038966687 |
| NKX2-2       | 0.515883306            | 0.000473061 | 0.013541971 |
| PCDHB5       | 0.516708791            | 2.33051E-06 | 0.002229464 |
| HS6ST2       | 0.51700734             | 0.000342706 | 0.011439572 |
| ETV4         | 0.517327576            | 1.67971E-05 | 0.003403309 |
| NEK3         | 0.517429184            | 2.52446E-05 | 0.003800098 |
| ETV6         | 0.517480594            | 0.000294569 | 0.010671558 |
| LOC100507516 | 0.518255945            | 0.00225279  | 0.032991732 |
| CNRIP1       | 0.518748321            | 3.36349E-05 | 0.004061922 |
| KIAA1644     | 0.518922142            | 0.002926548 | 0.038695826 |
| ESPL1        | 0.518982093            | 1.44759E-05 | 0.00323775  |
| GMFG         | 0.519581991            | 0.000153203 | 0.00799833  |
| CENPQ        | 0.520598599            | 0.004094873 | 0.047760795 |
| MNS1         | 0.520782665            | 0.000223786 | 0.00931247  |
| GTF3C6       | 0.521442471            | 4.79039E-06 | 0.002378207 |
| CENPK        | 0.52158104             | 4.76066E-06 | 0.002378207 |
| C3AR1        | 0.522565336            | 0.000508232 | 0.014053572 |
| SNAI2        | 0.522948217            | 4.26925E-06 | 0.002359839 |
| PSRC1        | 0.522969966            | 0.003873585 | 0.046301899 |
| C1orf31      | 0.523216521            | 0.000189572 | 0.008647792 |
| DKK2         | 0.523303568            | 0.003258525 | 0.041423595 |
| PBK          | 0.523474077            | 1.19256E-05 | 0.003001948 |
| MARCH4       | 0.52366884             | 0.000252618 | 0.009803337 |
| PTPRB        | 0.524111862            | 0.001788671 | 0.028739981 |
| FANCD2       | 0.52445831             | 0.000214053 | 0.009174164 |
| PLK4         | 0.524618286            | 0.004028732 | 0.047359904 |
| NET1         | 0.524885021            | 9.60418E-06 | 0.002892962 |
| BCAR3        | 0.526507748            | 0.001052169 | 0.021232736 |
| DEPDC1       | 0.526902039            | 3.24267E-05 | 0.003996833 |
| ARHGAP11B    | 0.52738435             | 2.64601E-05 | 0.003800098 |
| CC2D2A       | 0.529029471            | 0.002739825 | 0.037273526 |
| SPP1         | 0.529083256            | 0.003265272 | 0.041443999 |
| C15orf48     | 0.529151717            | 0.001524176 | 0.026319402 |
| GRAMD1B      | 0.529161498            | 1.08213E-05 | 0.002935558 |
| HOXB5        | 0.529198178            | 0.002320238 | 0.033650041 |

| GENE         | fold change (JQ1/DMSO) | p-value     | FDR         |
|--------------|------------------------|-------------|-------------|
| MYLK         | 0.529658116            | 0.000952392 | 0.020191539 |
| PPAP2C       | 0.530566932            | 1.04767E-05 | 0.002925673 |
| FRMD4B       | 0.53111886             | 0.002059812 | 0.031242133 |
| MIR143       | 0.531316468            | 0.000890128 | 0.019448835 |
| PALMD        | 0.532001911            | 2.89505E-05 | 0.003813855 |
| SHC4         | 0.53205231             | 0.000903629 | 0.019601764 |
| CALD1        | 0.532631626            | 7.46778E-05 | 0.005529648 |
| SH2D2A       | 0.533145051            | 0.000329855 | 0.011250532 |
| SYDE1        | 0.533201718            | 7.89014E-05 | 0.00565569  |
| LOC100287314 | 0.533926601            | 0.000977432 | 0.020469991 |
| SNORD91B     | 0.534402996            | 0.003945356 | 0.046810833 |
| ZNF367       | 0.53471671             | 0.000133107 | 0.007473402 |
| GEM          | 0.53481432             | 2.61737E-05 | 0.003800098 |
| TM4SF19      | 0.53529027             | 0.00015732  | 0.008056377 |
| BANK1        | 0.536384703            | 0.000355325 | 0.011695146 |
| KRT34        | 0.536702061            | 0.000525567 | 0.01433333  |
| CCDC34       | 0.537270302            | 0.000180979 | 0.008500497 |
| LGALS1       | 0.538177258            | 0.000175211 | 0.008417821 |
| PBX2         | 0.538481991            | 2.43922E-05 | 0.003758137 |
| FMO3         | 0.538516828            | 0.002728716 | 0.03717113  |
| PCED1B       | 0.538549179            | 0.000659936 | 0.016434644 |
| CDK1         | 0.538977393            | 0.000779895 | 0.017972842 |
| MCM2         | 0.539101938            | 1.14418E-05 | 0.002969775 |
| MMACHC       | 0.539889726            | 0.001570929 | 0.02672224  |
| KDM4D        | 0.54024161             | 1.02789E-05 | 0.002925673 |
| RIBC2        | 0.540285299            | 0.002693595 | 0.0369556   |
| CXCL10       | 0.540304025            | 0.003535665 | 0.043700265 |
| KLHDC8A      | 0.540396412            | 0.001655896 | 0.027508561 |
| SRPX2        | 0.540852336            | 0.000958157 | 0.020265682 |
| PRR11        | 0.54129989             | 6.38547E-05 | 0.005163948 |
| SNORA45      | 0.542201121            | 0.003606737 | 0.044262398 |
| HMGA2        | 0.542257497            | 8.2974E-06  | 0.00268001  |
| SNORD123     | 0.542331422            | 0.003160502 | 0.040509854 |
| FHL2         | 0.543250687            | 7.23169E-05 | 0.005438644 |
| PCDHB15      | 0.543374964            | 0.001905844 | 0.029811583 |
| MORN4        | 0.543734145            | 7.05851E-06 | 0.002575353 |
| CKAP2L       | 0.543751733            | 7.23232E-05 | 0.005438644 |
| HOXD10       | 0.543869842            | 0.001478313 | 0.025893494 |

(Continued)

| GENE         | fold change (JQ1/DMSO) | p-value     | FDR         |
|--------------|------------------------|-------------|-------------|
| MCPH1        | 0.5445438              | 2.76266E-05 | 0.003810686 |
| C4orf19      | 0.544753953            | 0.001059061 | 0.021307195 |
| EIF2D        | 0.544996927            | 0.001050423 | 0.021213006 |
| EFEMP1       | 0.545063669            | 4.70566E-07 | 0.001586766 |
| AURKA        | 0.545271504            | 0.000518059 | 0.014224475 |
| PRSS23       | 0.5453156              | 0.000356312 | 0.011698947 |
| SUV39H1      | 0.545561345            | 0.000276423 | 0.010285199 |
| CD3D         | 0.545789546            | 0.00271624  | 0.037097844 |
| MOK          | 0.545977474            | 2.37546E-05 | 0.003758137 |
| TRBV20-1     | 0.546297982            | 0.001143427 | 0.022244966 |
| FBXO5        | 0.546339637            | 8.8106E-05  | 0.006033179 |
| MCM10        | 0.546343424            | 0.000322972 | 0.011136864 |
| ANKRD36B     | 0.54684985             | 0.002229162 | 0.032736505 |
| SNORD13P3    | 0.546921873            | 0.003351733 | 0.042172651 |
| METTL4       | 0.547414922            | 0.002593041 | 0.036131239 |
| PBX2         | 0.548052751            | 2.85126E-05 | 0.003810686 |
| PBX2         | 0.548052751            | 2.85126E-05 | 0.003810686 |
| ANO1         | 0.548161661            | 0.000474493 | 0.01355556  |
| AHSA2        | 0.548898005            | 0.003409241 | 0.042599225 |
| TMPO         | 0.549130139            | 5.0973E-05  | 0.004716623 |
| WEE1         | 0.549405529            | 0.000141506 | 0.007671514 |
| IL31RA       | 0.54947408             | 0.000275011 | 0.010239767 |
| HOXA4        | 0.550429615            | 0.000143895 | 0.007746203 |
| ARHGAP11A    | 0.550844366            | 4.53495E-06 | 0.002376493 |
| CD82         | 0.550913097            | 5.6477E-05  | 0.004873588 |
| DDX60        | 0.551067137            | 0.002305563 | 0.033573431 |
| TRBJ2-3      | 0.551133349            | 0.00134911  | 0.024491353 |
| MB21D1       | 0.551289998            | 0.000258908 | 0.009936915 |
| LOC100134259 | 0.552309941            | 0.000688098 | 0.016769887 |
| RPL29        | 0.552589479            | 5.43389E-06 | 0.002522548 |
| RFC3         | 0.552677582            | 4.64674E-06 | 0.002378207 |
| FOXM1        | 0.552712061            | 9.08902E-05 | 0.006098098 |
| MBOAT1       | 0.552954751            | 0.000841544 | 0.018776995 |
| NHLRC3       | 0.554182605            | 0.001475824 | 0.025870527 |
| LOC286297    | 0.554351648            | 0.000163883 | 0.008219752 |
| PLEKHG4      | 0.55459634             | 1.2314E-05  | 0.003021453 |
| PBX2         | 0.555499172            | 8.00277E-06 | 0.002661222 |
| PBX2         | 0.555499172            | 8.00277E-06 | 0.002661222 |

| GENE       | fold change (JQ1/DMSO) | p-value     | FDR         |
|------------|------------------------|-------------|-------------|
| PBX2       | 0.555499172            | 8.00277E-06 | 0.002661222 |
| CALB2      | 0.555598009            | 0.002236356 | 0.032824172 |
| FRMD6      | 0.555689159            | 4.62143E-05 | 0.004592806 |
| MKX        | 0.556020508            | 0.001722026 | 0.028043222 |
| TOMM40L    | 0.556071897            | 1.74225E-05 | 0.003459786 |
| ANXA8L2    | 0.556947534            | 4.38866E-06 | 0.002367448 |
| SAMD9L     | 0.557062073            | 0.000466638 | 0.013480458 |
| C5orf34    | 0.557094251            | 0.000970566 | 0.020431387 |
| RAD54L     | 0.557116133            | 0.003922839 | 0.046672189 |
| VAX1       | 0.557129006            | 0.003265772 | 0.041443999 |
| PLBD1      | 0.557217832            | 4.87333E-05 | 0.004656499 |
| WDR66      | 0.557565551            | 0.00278264  | 0.037704526 |
| FAM200B    | 0.55764414             | 0.000901678 | 0.019588845 |
| ZNF93      | 0.558349358            | 0.003130942 | 0.040251806 |
| BAIAP2L1   | 0.558634534            | 0.000297155 | 0.010714566 |
| SFXN4      | 0.558777822            | 0.000622563 | 0.015849934 |
| GPATCH4    | 0.558839796            | 7.97366E-05 | 0.005695459 |
| FAM225A    | 0.558882407            | 2.44446E-05 | 0.003758137 |
| H2AFY2     | 0.558910816            | 0.000108469 | 0.006723448 |
| DOCK2      | 0.559565918            | 0.000206961 | 0.009058472 |
| CMPK2      | 0.559690048            | 0.000587127 | 0.015318729 |
| KLF7       | 0.559775403            | 3.67925E-05 | 0.004197241 |
| BDH2       | 0.559846542            | 0.000604598 | 0.015569996 |
| CDCA3      | 0.560528642            | 0.000168828 | 0.008281033 |
| LOC375295  | 0.560782539            | 0.000675791 | 0.016613428 |
| METAP1D    | 0.56100544             | 0.000317233 | 0.011073621 |
| NEIL3      | 0.562014789            | 0.000131624 | 0.007444562 |
| TIPIN      | 0.562821755            | 1.40027E-05 | 0.00323775  |
| TMEM79     | 0.563382504            | 0.00102872  | 0.021005521 |
| TBL1XR1    | 0.563437178            | 0.000234691 | 0.009454115 |
| LIMS1      | 0.56432702             | 0.000565581 | 0.015007996 |
| TMEM158    | 0.564971501            | 0.00020449  | 0.008994373 |
| TTLL11-IT1 | 0.56500283             | 0.00169422  | 0.027847638 |
| TAGLN      | 0.565589274            | 0.001767277 | 0.028542348 |
| GPR39      | 0.565876841            | 0.000171955 | 0.008351188 |
| MLPH       | 0.566016756            | 0.001120736 | 0.022013715 |
| PRIM1      | 0.566363423            | 1.03982E-05 | 0.002925673 |
| CDC45      | 0.566650074            | 8.88445E-05 | 0.006036779 |

(Continued)

| GENE        | fold change (JQ1/DMSO) | p-value     | FDR         |
|-------------|------------------------|-------------|-------------|
| EMP2        | 0.568320502            | 0.001781507 | 0.028684403 |
| EPB41L3     | 0.569181233            | 2.26795E-06 | 0.002210921 |
| SNORD114-15 | 0.569448259            | 0.000702673 | 0.016889235 |
| CNN2        | 0.56980361             | 6.77924E-06 | 0.002575353 |
| ME3         | 0.570065659            | 0.00148632  | 0.02594986  |
| SEMA3E      | 0.570571662            | 0.002609223 | 0.036274187 |
| ANGPT1      | 0.570692958            | 0.003124897 | 0.040212711 |
| MSC         | 0.571008186            | 3.21999E-05 | 0.003996833 |
| FAM111A     | 0.571107143            | 0.001301831 | 0.023922571 |
| ITGA4       | 0.571196878            | 0.00014831  | 0.007865418 |
| SHROOM2     | 0.571336788            | 0.001674941 | 0.02767498  |
| PLEKHO1     | 0.57146749             | 0.000545521 | 0.014653908 |
| KCNQ3       | 0.571534833            | 0.000657658 | 0.016416038 |
| CD70        | 0.571558603            | 0.000339287 | 0.011405361 |
| ZBTB38      | 0.571682751            | 0.001284313 | 0.023753367 |
| TNC         | 0.571685393            | 1.67994E-05 | 0.003403309 |
| ZFP36L2     | 0.572088401            | 0.000668179 | 0.016524492 |
| BCAT1       | 0.572381917            | 1.42875E-05 | 0.00323775  |
| CCNE2       | 0.572515504            | 0.000184915 | 0.008547613 |
| TMEM144     | 0.572606783            | 0.000635355 | 0.016024825 |
| KIRREL3     | 0.572904536            | 0.000856119 | 0.019023014 |
| USP1        | 0.572928363            | 0.000673893 | 0.016599178 |
| IGFBP7      | 0.573276614            | 0.000129574 | 0.007383762 |
| SP100       | 0.574465968            | 0.000753442 | 0.017594643 |
| C4orf26     | 0.575655129            | 0.000293067 | 0.010653134 |
| TNIP1       | 0.575734937            | 0.000515805 | 0.014204374 |
| PCDHB6      | 0.576208694            | 0.002962866 | 0.038964922 |
| COL8A1      | 0.576496332            | 0.004337956 | 0.049465799 |
| LRRCC1      | 0.576940055            | 0.001653454 | 0.027508561 |
| SLC20A1     | 0.576958717            | 0.000130912 | 0.007419777 |
| MMS22L      | 0.577017375            | 0.000118789 | 0.007100457 |
| FAM54A      | 0.577202719            | 0.000988212 | 0.020591218 |
| IFITM4P     | 0.577809835            | 0.000286802 | 0.010499642 |
| IFITM4P     | 0.577809835            | 0.000286802 | 0.010499642 |
| CDC25A      | 0.578154374            | 0.00070012  | 0.016871161 |
| TMEM145     | 0.578400218            | 0.000231378 | 0.009435328 |
| ACOT2       | 0.578430955            | 0.000530003 | 0.014417641 |
| LPAR1       | 0.579062108            | 0.000159296 | 0.008103391 |

| GENE        | fold change (JQ1/DMSO) | p-value     | FDR         |
|-------------|------------------------|-------------|-------------|
| LOC81691    | 0.57919993             | 0.001339492 | 0.024395225 |
| SLC46A3     | 0.580351957            | 1.57291E-05 | 0.003303415 |
| CD3EAP      | 0.580828171            | 0.001377872 | 0.024782745 |
| ADAMTSL1    | 0.58086709             | 0.000334515 | 0.011337352 |
| MIR548H3    | 0.581093948            | 0.001198676 | 0.02286354  |
| RNF144A-AS1 | 0.581222853            | 0.001740976 | 0.028269506 |
| DLG4        | 0.581449849            | 4.33865E-05 | 0.004472203 |
| ATP10A      | 0.581799247            | 0.00069023  | 0.016798939 |
| CENPL       | 0.582062778            | 0.000198495 | 0.008846805 |
| PRRG4       | 0.58267366             | 0.000887376 | 0.019419771 |
| S100A2      | 0.582859474            | 0.003126798 | 0.040223015 |
| VPS52       | 0.582878328            | 1.07309E-05 | 0.002935503 |
| COL27A1     | 0.583635685            | 0.002789068 | 0.037744041 |
| TNF         | 0.583655912            | 3.21043E-07 | 0.001434447 |
| SERPINB5    | 0.583719297            | 0.003935928 | 0.046747896 |
| AAED1       | 0.584128089            | 0.000227786 | 0.009365952 |
| TRIP13      | 0.584799237            | 2.02889E-05 | 0.003617099 |
| LTBP2       | 0.584837071            | 0.001538352 | 0.026487418 |
| TRAF5       | 0.585060071            | 3.36366E-05 | 0.004061922 |
| TCF19       | 0.585786425            | 0.000190743 | 0.008647792 |
| C9orf100    | 0.585913664            | 0.004061469 | 0.047601699 |
| PRLR        | 0.586211564            | 0.003756551 | 0.045302518 |
| SHCBP1      | 0.586307737            | 0.000107786 | 0.006704364 |
| MELK        | 0.586673609            | 0.000151102 | 0.007935001 |
| PLAU        | 0.586792905            | 0.000239606 | 0.009558746 |
| PPP1R13L    | 0.586975964            | 0.002309986 | 0.033607109 |
| MR1         | 0.587320541            | 0.001073617 | 0.02144674  |
| TRPA1       | 0.587465757            | 0.001236519 | 0.023328093 |
| TRERF1      | 0.587939658            | 0.003125247 | 0.040212711 |
| PPEF1       | 0.588291597            | 0.003790269 | 0.045606565 |
| SH3RF3      | 0.58832286             | 0.000383228 | 0.012171722 |
| ERAP1       | 0.588329657            | 0.000764698 | 0.017744536 |
| PIGC        | 0.588843708            | 0.004022487 | 0.047317614 |
| IL1RAPL1    | 0.589011075            | 0.004212912 | 0.048634959 |
| PARP2       | 0.589352761            | 0.000125113 | 0.007226592 |
| RAB3IL1     | 0.589585657            | 0.00046406  | 0.013434938 |
| KIF1A       | 0.590087172            | 3.78983E-05 | 0.004277602 |
| KCNQ5-IT1   | 0.590331269            | 0.001092329 | 0.021717701 |

(Continued)



| GENE         | fold change (JQ1/DMSO) | p-value     | FDR         |
|--------------|------------------------|-------------|-------------|
| EGF          | 0.590504517            | 0.001299428 | 0.023892809 |
| TRIP10       | 0.590638239            | 0.000667528 | 0.016518836 |
| SASS6        | 0.590718759            | 4.89737E-05 | 0.004656499 |
| MTRF1        | 0.590888025            | 0.000215802 | 0.009204977 |
| PKMYT1       | 0.591219872            | 0.001458191 | 0.025676134 |
| PRC1         | 0.591349657            | 6.50527E-05 | 0.005201687 |
| ZNF692       | 0.591430274            | 0.000233885 | 0.009450269 |
| SMOC1        | 0.591545071            | 0.001696625 | 0.02787008  |
| ARHGAP31     | 0.59163255             | 0.000294259 | 0.010667535 |
| TTPA         | 0.592353378            | 0.000239016 | 0.009556541 |
| FERMT3       | 0.592390332            | 0.001791654 | 0.028746621 |
| SKP2         | 0.592536802            | 2.16296E-05 | 0.003658405 |
| CDC42EP1     | 0.592886013            | 0.001439103 | 0.025440285 |
| LOX          | 0.593260102            | 6.59186E-05 | 0.005212917 |
| NIPAL2       | 0.593489057            | 0.002923891 | 0.038695826 |
| PRR5L        | 0.593560366            | 0.000371208 | 0.011994194 |
| ZFP42        | 0.593965071            | 0.000389612 | 0.012252098 |
| ARHGDIB      | 0.594028203            | 0.000485672 | 0.013763359 |
| GPX7         | 0.594202536            | 3.51151E-05 | 0.004086104 |
| TCF4         | 0.59453487             | 0.001398521 | 0.024986505 |
| SNUPN        | 0.594868765            | 0.000470103 | 0.01351502  |
| ITPR3        | 0.595154717            | 7.79084E-05 | 0.005607    |
| POSTN        | 0.595180844            | 0.000490447 | 0.013786988 |
| SHC3         | 0.595264735            | 5.01791E-05 | 0.004692392 |
| CTPS2        | 0.595625187            | 0.000661148 | 0.016454224 |
| MDFI         | 0.595877082            | 0.004265233 | 0.048948844 |
| MFAP2        | 0.595889473            | 2.82258E-05 | 0.003810686 |
| CAV1         | 0.596232394            | 6.29895E-06 | 0.002575353 |
| LOC100506394 | 0.596268213            | 0.001918677 | 0.029941069 |
| TSKU         | 0.596346745            | 4.67934E-05 | 0.004620482 |
| CCDC80       | 0.596703716            | 0.000832802 | 0.018659567 |
| TFR2         | 0.597066419            | 0.00041402  | 0.012619675 |
| C21orf88     | 0.59753978             | 5.87582E-05 | 0.004947862 |
| MYPN         | 0.597608815            | 0.000374688 | 0.012051096 |
| ADTRP        | 0.597653001            | 0.003737854 | 0.045188843 |
| FANCI        | 0.597867075            | 0.000227286 | 0.009352854 |
| LOC283624    | 0.598016281            | 0.000245537 | 0.009685506 |
| MMP1         | 0.598468271            | 0.001073493 | 0.02144674  |

| GENE        | fold change (JQ1/DMSO) | p-value     | FDR         |
|-------------|------------------------|-------------|-------------|
| PLXNA2      | 0.598512521            | 1.80236E-05 | 0.003504171 |
| MYL9        | 0.598547093            | 0.000577862 | 0.015170514 |
| HYI         | 0.598699236            | 1.48102E-05 | 0.00323775  |
| SEMA5A      | 0.59960182             | 0.000102829 | 0.00656324  |
| SNORD114-28 | 0.599781945            | 0.000998372 | 0.020707819 |
| HOXB2       | 0.599960739            | 6.73014E-06 | 0.002575353 |
| ALKBH3      | 0.600081351            | 0.000325527 | 0.011181154 |
| LAPTM5      | 0.600175639            | 0.002188767 | 0.032380098 |
| MIR199A1    | 0.600471079            | 0.001073777 | 0.02144674  |
| S100A16     | 0.60090271             | 0.00021311  | 0.009159657 |
| RNASEH2B    | 0.60114017             | 0.001400776 | 0.025005798 |
| WDHD1       | 0.60201305             | 7.94046E-05 | 0.005684161 |
| AURKB       | 0.602260689            | 1.93235E-05 | 0.003557359 |
| CDCA8       | 0.602333053            | 0.000120898 | 0.007154733 |
| ZNF738      | 0.602915058            | 0.003679922 | 0.044875369 |
| VPS52       | 0.603256447            | 9.60086E-05 | 0.006301645 |
| MN1         | 0.603313596            | 0.001406294 | 0.025064495 |
| TNF         | 0.603784935            | 7.51835E-05 | 0.005529648 |
| HIVEP3      | 0.603964922            | 5.88944E-05 | 0.004947862 |
| KRT75       | 0.604045864            | 0.00119148  | 0.022783707 |
| GALNT14     | 0.604089131            | 8.35163E-06 | 0.002681373 |
| BCL2        | 0.604220345            | 0.001572629 | 0.026725721 |
| OR7E14P     | 0.60457225             | 0.003995026 | 0.047170515 |
| SKA3        | 0.604658862            | 0.00033506  | 0.011344438 |
| DOCK10      | 0.604665847            | 0.000320287 | 0.011115243 |
| RARB        | 0.604970486            | 0.001379588 | 0.02479727  |
| GPR126      | 0.605191376            | 0.000764254 | 0.017744536 |
| VPS52       | 0.605296256            | 2.0306E-05  | 0.003617099 |
| VPS52       | 0.605296256            | 2.0306E-05  | 0.003617099 |
| HOXB9       | 0.605829331            | 0.000708088 | 0.016948908 |
| MRPL3       | 0.606348866            | 2.4814E-05  | 0.003790462 |
| SNORA66     | 0.606751076            | 0.00409566  | 0.047760795 |
| IFRD2       | 0.60711708             | 0.00086665  | 0.01914593  |
| SLC44A3     | 0.607131108            | 0.000219125 | 0.009256125 |
| ORC1        | 0.607486113            | 6.18156E-05 | 0.005079279 |
| UFSP2       | 0.607587179            | 0.002726759 | 0.037162862 |
| TRIM8       | 0.607967735            | 0.00029599  | 0.010686933 |
| TPM1        | 0.608057643            | 0.001559858 | 0.026677801 |

(Continued)

| GENE         | fold change (JQ1/DMSO) | p-value     | FDR         |
|--------------|------------------------|-------------|-------------|
| BACE2        | 0.608781603            | 5.61542E-05 | 0.004873588 |
| ST3GAL5      | 0.609327602            | 0.000733323 | 0.017283826 |
| RUNX2        | 0.610371709            | 1.70976E-06 | 0.002083338 |
| FANCG        | 0.610550838            | 0.000152032 | 0.00796823  |
| MRPL11       | 0.610610089            | 7.15218E-05 | 0.005424023 |
| PHF5A        | 0.61125517             | 0.000714687 | 0.017051063 |
| FAM171A1     | 0.611290478            | 6.52053E-06 | 0.002575353 |
| LOC100506257 | 0.611492482            | 0.00255791  | 0.035836807 |
| SNORD114-9   | 0.611864174            | 0.000837201 | 0.018726828 |
| ALG8         | 0.611883966            | 0.000237628 | 0.009524872 |
| ARMC4        | 0.612250237            | 0.001625131 | 0.027289273 |
| TMEM54       | 0.612267213            | 0.002150313 | 0.032034824 |
| VPS52        | 0.612422843            | 7.63948E-05 | 0.005567586 |
| VPS52        | 0.612422843            | 7.63948E-05 | 0.005567586 |
| NKX2-5       | 0.612705908            | 0.000890155 | 0.019448835 |
| MUS81        | 0.612765368            | 0.000241757 | 0.009608913 |
| BCL2A1       | 0.61293387             | 0.000764825 | 0.017744536 |
| LRRC4B       | 0.613313523            | 0.002977598 | 0.039081976 |
| MYADM        | 0.613494933            | 0.001074067 | 0.02144674  |
| STIL         | 0.614449635            | 0.000109025 | 0.006734555 |
| STAT6        | 0.614986509            | 9.88598E-05 | 0.00641715  |
| CCDC111      | 0.615523851            | 0.002372638 | 0.034032566 |
| CDC45        | 0.616390558            | 0.000154861 | 0.008014655 |
| SGCD         | 0.616542962            | 0.003907284 | 0.046554855 |
| TOE1         | 0.616681156            | 0.000470866 | 0.013521329 |
| KIFC1        | 0.61690347             | 2.25763E-05 | 0.003702475 |
| CDKL1        | 0.617964842            | 0.000397952 | 0.012386834 |
| ESX1         | 0.618366185            | 0.000257055 | 0.009915481 |
| UROD         | 0.618654856            | 0.000108037 | 0.00671219  |
| NRM          | 0.618720611            | 0.001568692 | 0.026708702 |
| NRM          | 0.618720611            | 0.001568692 | 0.026708702 |
| NRM          | 0.618720611            | 0.001568692 | 0.026708702 |
| NRM          | 0.618720611            | 0.001568692 | 0.026708702 |
| NRM          | 0.618720611            | 0.001568692 | 0.026708702 |
| NRM          | 0.618720611            | 0.001568692 | 0.026708702 |
| NRM          | 0.618720611            | 0.001568692 | 0.026708702 |
| NRM          | 0.618720611            | 0.001568692 | 0.026708702 |
| ADCY3        | 0.618732048            | 0.002719669 | 0.037100455 |
| SOX9         | 0.618799241            | 9.32132E-05 | 0.006170138 |

| GENE      | fold change (JQ1/DMSO) | p-value     | FDR         |
|-----------|------------------------|-------------|-------------|
| CHEK1     | 0.619053786            | 3.39285E-05 | 0.004065425 |
| IL27RA    | 0.619135319            | 0.001818574 | 0.028993899 |
| KCNQ5     | 0.619246909            | 0.004325889 | 0.049368843 |
| ATF1      | 0.619424349            | 0.000269768 | 0.010157409 |
| VPS52     | 0.619886791            | 9.71448E-05 | 0.006351967 |
| FEN1      | 0.620386845            | 0.000339104 | 0.011405361 |
| CGB       | 0.620505828            | 0.000203956 | 0.008994373 |
| KIF23     | 0.620993469            | 2.6414E-05  | 0.003800098 |
| DKK1      | 0.621424058            | 0.002171082 | 0.03220999  |
| HEY1      | 0.621425494            | 0.000172204 | 0.008353596 |
| ANP32E    | 0.621635155            | 0.000316262 | 0.01105412  |
| ATAD5     | 0.621648082            | 0.000199572 | 0.00887268  |
| NSMCE1    | 0.621665318            | 0.00237058  | 0.034030358 |
| AFF3      | 0.621862129            | 4.80518E-05 | 0.004656499 |
| XBP1      | 0.622234374            | 0.000395646 | 0.012363843 |
| PRRX1     | 0.622720495            | 0.000321212 | 0.011115243 |
| CHAF1A    | 0.622858634            | 0.00018461  | 0.008547613 |
| SLC29A1   | 0.623002561            | 0.000266979 | 0.010116334 |
| LOC388796 | 0.623142203            | 0.001850518 | 0.029296357 |
| PION      | 0.623378369            | 0.000792065 | 0.018139719 |
| RNLS      | 0.623464794            | 0.001794552 | 0.028764871 |
| LIN9      | 0.623499367            | 2.39147E-05 | 0.003758137 |
| ATL3      | 0.623644883            | 1.13902E-05 | 0.002969775 |
| C1orf133  | 0.623652088            | 0.000930519 | 0.019940702 |
| WHSC1     | 0.623665057            | 6.51784E-06 | 0.002575353 |
| CBS       | 0.62377458             | 0.000140231 | 0.007661461 |
| TROAP     | 0.623812053            | 0.001708729 | 0.027931989 |
| LPP       | 0.624385959            | 0.000451717 | 0.01322017  |
| NFIX      | 0.624710637            | 5.11349E-05 | 0.004718933 |
| KCNN4     | 0.624995049            | 0.000232172 | 0.009450269 |
| FAM125B   | 0.62505859             | 0.000245967 | 0.009685506 |
| TYMS      | 0.62512936             | 3.26313E-05 | 0.003997539 |
| TPX2      | 0.625229028            | 2.94585E-07 | 0.001434447 |
| SNORD4B   | 0.625341716            | 0.000503835 | 0.014003513 |
| RAB27A    | 0.625513676            | 0.004377947 | 0.049773618 |
| TRHDE     | 0.626170161            | 0.000183807 | 0.00854536  |
| LOC728084 | 0.626284466            | 0.004257587 | 0.048902965 |
| PPIL3     | 0.62645379             | 0.001174044 | 0.022619014 |

(Continued)

| GENE         | fold change (JQ1/DMSO) | p-value     | FDR         |
|--------------|------------------------|-------------|-------------|
| SPAG5        | 0.626565251            | 0.000179209 | 0.008500179 |
| PLXND1       | 0.626928723            | 0.000351919 | 0.011654627 |
| ADAMTS6      | 0.627018537            | 0.002297962 | 0.033480932 |
| NLGN1        | 0.627263418            | 0.003758708 | 0.045318337 |
| PXMP2        | 0.627276462            | 0.0013901   | 0.024897217 |
| KIFC1        | 0.6274736              | 7.38816E-06 | 0.002575353 |
| KIFC1        | 0.6274736              | 7.38816E-06 | 0.002575353 |
| LOC100509671 | 0.627899978            | 0.001865699 | 0.029435749 |
| ANAPC15      | 0.628161168            | 0.001047251 | 0.021180859 |
| CENPI        | 0.628447152            | 6.56273E-05 | 0.005212917 |
| MCM6         | 0.628574942            | 8.97682E-05 | 0.006061841 |
| SDC1         | 0.629100901            | 0.001175841 | 0.022619607 |
| SASH1        | 0.629346596            | 0.001423243 | 0.025251496 |
| NKAIN4       | 0.629398946            | 0.003997199 | 0.047175395 |
| EXO1         | 0.629420759            | 5.89265E-05 | 0.004947862 |
| ARHGEF2      | 0.629494931            | 0.000125814 | 0.007245724 |
| CCDC58       | 0.630107549            | 0.000254768 | 0.009855625 |
| LRRC6        | 0.6304891              | 4.11259E-05 | 0.004363083 |
| TRIM14       | 0.630579424            | 0.002975771 | 0.03906756  |
| TMEM209      | 0.631249976            | 0.000430648 | 0.012892269 |
| ADRA1D       | 0.631499428            | 0.001676356 | 0.0276813   |
| GSG2         | 0.631893501            | 0.003262417 | 0.041423595 |
| RFC2         | 0.631943143            | 0.002237448 | 0.032831212 |
| MTHFD1L      | 0.63209063             | 0.000103985 | 0.006566977 |
| CD34         | 0.632093551            | 0.001520581 | 0.026303415 |
| MYBL2        | 0.63243831             | 1.33513E-05 | 0.003200149 |
| TRIM47       | 0.632593221            | 0.001278005 | 0.023685722 |
| SPHK1        | 0.632790568            | 3.44663E-05 | 0.004083199 |
| IGKV1OR2-118 | 0.632913392            | 0.002072715 | 0.031347292 |
| IGKV1OR2-118 | 0.632913392            | 0.002072715 | 0.031347292 |
| NMI          | 0.633365417            | 0.001650964 | 0.027508561 |
| TMEM98       | 0.633516163            | 0.000682438 | 0.016692645 |
| PON2         | 0.633560077            | 8.27238E-05 | 0.005816524 |
| PLK1         | 0.634009633            | 4.85752E-05 | 0.004656499 |
| PSMB9        | 0.634181047            | 0.000384938 | 0.012171722 |
| TMEM218      | 0.635075491            | 0.00040341  | 0.012452294 |
| BUB1B        | 0.635128318            | 0.000108965 | 0.006734555 |
| DPPA4        | 0.635135655            | 0.002091966 | 0.031498158 |

| GENE      | fold change (JQ1/DMSO) | p-value     | FDR         |
|-----------|------------------------|-------------|-------------|
| MMP14     | 0.635508503            | 9.82037E-06 | 0.002909054 |
| CAMKK1    | 0.63594034             | 0.00060146  | 0.015518524 |
| ZHX2      | 0.635972667            | 0.000205428 | 0.009011996 |
| HIST1H2AM | 0.63609023             | 0.00035347  | 0.011677142 |
| PSMB8     | 0.636162249            | 0.000804349 | 0.018265964 |
| LINC00525 | 0.636456286            | 0.002271641 | 0.033205719 |
| TMEM62    | 0.636927028            | 7.50329E-05 | 0.005529648 |
| MME       | 0.63704624             | 0.001663574 | 0.027554071 |
| HIST1H4A  | 0.637574868            | 0.000287717 | 0.010515694 |
| KIF18A    | 0.637708935            | 0.000647113 | 0.016228371 |
| IFITM4P   | 0.637856294            | 0.001164933 | 0.022500077 |
| IFITM4P   | 0.637856294            | 0.001164933 | 0.022500077 |
| CLPP      | 0.63803317             | 3.39418E-05 | 0.004065425 |
| MCM3      | 0.638569993            | 2.79962E-06 | 0.002229464 |
| GTF2IRD1  | 0.638754446            | 0.000232846 | 0.009450269 |
| LRRK1     | 0.638868096            | 0.003894166 | 0.046460503 |
| TMEM48    | 0.638884333            | 0.000168886 | 0.008281033 |
| ZWINT     | 0.638955191            | 9.3535E-06  | 0.00285781  |
| CCNA2     | 0.63935244             | 3.47382E-05 | 0.004083199 |
| IGFBP3    | 0.639985001            | 0.000105986 | 0.006643128 |
| WNT7B     | 0.640104786            | 0.003721371 | 0.045060622 |
| EXOSC8    | 0.640166905            | 0.000396237 | 0.012366146 |
| C1orf106  | 0.640384369            | 0.000783552 | 0.018019283 |
| SPTBN2    | 0.640727729            | 0.001516314 | 0.026302235 |
| PCDHB8    | 0.640754377            | 0.002795236 | 0.037780473 |
| SNORD14A  | 0.64104165             | 0.000594557 | 0.015395971 |
| RAB7L1    | 0.64104165             | 0.001617688 | 0.027241073 |
| RMI2      | 0.641744086            | 0.001554186 | 0.026648798 |
| PDPN      | 0.641836022            | 0.003895574 | 0.046466961 |
| THY1      | 0.642183128            | 0.001084081 | 0.021623948 |
| CTDSPL    | 0.642702653            | 0.000763904 | 0.017744536 |
| EMG1      | 0.642825917            | 0.000158656 | 0.008093871 |
| RBPM2     | 0.643302857            | 0.004381196 | 0.049783015 |
| RIN1      | 0.643316234            | 0.000951347 | 0.020179123 |
| SPC24     | 0.643829238            | 0.001168835 | 0.022551071 |
| OCIAD2    | 0.643982475            | 0.002847724 | 0.038142997 |
| KIF21B    | 0.644567491            | 0.00164565  | 0.027478921 |
| RASGRP1   | 0.644568981            | 0.002486925 | 0.035191728 |

(Continued)

| GENE         | fold change (JQ1/DMSO) | p-value     | FDR         |
|--------------|------------------------|-------------|-------------|
| IQCB1        | 0.645399038            | 0.002505218 | 0.03537347  |
| AADAT        | 0.645688394            | 0.000380198 | 0.012141201 |
| ZNF827       | 0.645780896            | 0.000417304 | 0.012680208 |
| PHACTR1      | 0.645809245            | 0.003991349 | 0.047147865 |
| CUTA         | 0.64585998             | 8.33939E-05 | 0.005837246 |
| MRPL15       | 0.646157007            | 0.000249985 | 0.009755055 |
| KNTC1        | 0.646401895            | 0.000111301 | 0.006820144 |
| SLC25A43     | 0.646624466            | 0.00193884  | 0.030131822 |
| UAP1L1       | 0.646939781            | 0.000899839 | 0.019572685 |
| LOC100133286 | 0.647016018            | 0.002626285 | 0.03644233  |
| C15orf41     | 0.647336011            | 9.31191E-05 | 0.006170138 |
| ECT2         | 0.647404815            | 0.000200265 | 0.008896113 |
| CUTA         | 0.647475122            | 0.000745207 | 0.017469089 |
| SULF2        | 0.647837252            | 0.004006492 | 0.047222704 |
| NGDN         | 0.647858208            | 3.20346E-06 | 0.002230648 |
| C3orf36      | 0.647901618            | 0.004089815 | 0.04773261  |
| WT1          | 0.647948026            | 0.00231254  | 0.033608531 |
| C17orf53     | 0.648368842            | 4.18887E-05 | 0.004378063 |
| EDNRA        | 0.648433261            | 8.87877E-05 | 0.006036779 |
| HIST1H3E     | 0.64846772             | 0.00018411  | 0.008546689 |
| NABP2        | 0.648478209            | 1.88657E-06 | 0.002083338 |
| NFKB1        | 0.648707489            | 0.000454717 | 0.013264723 |
| CA12         | 0.649121299            | 0.000698431 | 0.016860772 |
| ICAM3        | 0.649253294            | 0.00264025  | 0.036541632 |
| LEF1         | 0.649305799            | 0.000769207 | 0.017838483 |
| KY           | 0.650131442            | 0.000281334 | 0.010398818 |
| TDRD3        | 0.650331255            | 9.27383E-05 | 0.006169168 |
| MTX3         | 0.650358302            | 0.000288606 | 0.010541    |
| PIGB         | 0.650562694            | 0.001646582 | 0.027485924 |
| CHCHD4       | 0.650615305            | 0.000134841 | 0.007507549 |
| TCOF1        | 0.650676941            | 0.000181085 | 0.008500497 |
| BRX1         | 0.650837823            | 0.000597005 | 0.015426321 |
| AP1S1        | 0.650970167            | 0.000772423 | 0.017866697 |
| TAPBP        | 0.65111006             | 0.001969055 | 0.030355038 |
| ---          | 0.651507338            | 0.003108944 | 0.040079887 |
| DAZAP1       | 0.651797926            | 0.0011289   | 0.022114809 |
| GGT3P        | 0.651888291            | 0.002338043 | 0.033780343 |
| TAPBP        | 0.65196511             | 0.00161398  | 0.027196979 |

| GENE         | fold change (JQ1/DMSO) | p-value     | FDR         |
|--------------|------------------------|-------------|-------------|
| TAPBP        | 0.65196511             | 0.00161398  | 0.027196979 |
| KDELR3       | 0.652302622            | 0.001143327 | 0.022244966 |
| MED24        | 0.652579995            | 6.25785E-05 | 0.005106958 |
| KIF14        | 0.653391685            | 0.000147236 | 0.007848115 |
| PARP3        | 0.653566828            | 0.000486955 | 0.013777711 |
| KIAA0101     | 0.653601561            | 0.000224641 | 0.009329649 |
| ZDHHC6       | 0.653717852            | 0.00312137  | 0.040201416 |
| NEK2         | 0.653837185            | 0.000358085 | 0.011735601 |
| EPB41L4B     | 0.654066849            | 0.001467494 | 0.02578435  |
| MIR4640      | 0.654106142            | 0.003606644 | 0.044262398 |
| RFTN1        | 0.654422081            | 0.000832451 | 0.018659501 |
| CAPN2        | 0.654470468            | 1.81035E-05 | 0.003504171 |
| RAPGEF4      | 0.654993881            | 9.07725E-05 | 0.006098098 |
| LOC100507280 | 0.655054418            | 0.000119012 | 0.007102076 |
| CDK2         | 0.655066526            | 5.95385E-05 | 0.004964659 |
| C15orf52     | 0.655083175            | 0.000220401 | 0.009271914 |
| SORCS2       | 0.655779784            | 0.002831076 | 0.03799905  |
| KIF24        | 0.655911617            | 0.00073021  | 0.017239837 |
| SUSD4        | 0.656375518            | 0.000754971 | 0.017608023 |
| GLI2         | 0.656704691            | 0.004287921 | 0.049114604 |
| DIRAS3       | 0.657009741            | 0.002755274 | 0.037418826 |
| MAZ          | 0.657088683            | 0.000452208 | 0.01322017  |
| BCL3         | 0.657213187            | 0.000309524 | 0.010961525 |
| PSMB9        | 0.657635461            | 0.004138925 | 0.048108745 |
| PSMB9        | 0.657635461            | 0.004138925 | 0.048108745 |
| CWC22        | 0.658362165            | 0.000201954 | 0.008941509 |
| MAML2        | 0.658499082            | 0.000414246 | 0.012619675 |
| PPIH         | 0.658529511            | 0.000486418 | 0.013769944 |
| CCNB1        | 0.658535597            | 5.68883E-05 | 0.004873588 |
| IFITM4P      | 0.658643636            | 0.003923225 | 0.046672189 |
| FLI1         | 0.659245017            | 0.001906613 | 0.029811583 |
| VEGFC        | 0.659269388            | 0.001065638 | 0.021375351 |
| RILPL2       | 0.659290714            | 0.000703389 | 0.016891516 |
| DOC2B        | 0.659379071            | 0.001305048 | 0.02395507  |
| B3GALTL      | 0.659593917            | 0.002888609 | 0.038491103 |
| SLC52A3      | 0.660011622            | 0.003632598 | 0.044483903 |
| SH3KBP1      | 0.66056999             | 0.001358693 | 0.024585945 |
| HRCT1        | 0.660904321            | 0.001636151 | 0.027398555 |

(Continued)



| GENE      | fold change (JQ1/DMSO) | p-value     | FDR         |
|-----------|------------------------|-------------|-------------|
| CDCA4     | 0.66097304             | 0.000607404 | 0.015597309 |
| TDP1      | 0.661102863            | 6.62267E-05 | 0.005214096 |
| ZBTB8A    | 0.661484841            | 0.001143153 | 0.022244966 |
| LIMS3     | 0.661617821            | 0.000378037 | 0.01210825  |
| SSX2      | 0.661903743            | 0.001874707 | 0.029511618 |
| SSX2      | 0.661903743            | 0.001874707 | 0.029511618 |
| KIF4A     | 0.661992449            | 0.000190635 | 0.008647792 |
| DIAPH3    | 0.662494324            | 0.00081151  | 0.018343479 |
| NUAK1     | 0.662901612            | 4.12581E-05 | 0.004363083 |
| VRK1      | 0.663234059            | 0.00103607  | 0.021065971 |
| HIST2H2AB | 0.66372614             | 4.15201E-05 | 0.004363083 |
| SH2D4A    | 0.663729207            | 0.001415152 | 0.025157893 |
| PRDM6     | 0.663977687            | 0.001895178 | 0.029726503 |
| TMEM97    | 0.664367467            | 0.000162669 | 0.008189506 |
| PTHLH     | 0.6645563              | 1.44719E-05 | 0.00323775  |
| HPS4      | 0.664603901            | 3.97589E-05 | 0.004332831 |
| SNAPC1    | 0.66477437             | 0.000261303 | 0.009993069 |
| PSMC3IP   | 0.664818914            | 0.001972026 | 0.030374639 |
| MEST      | 0.665468985            | 7.2882E-05  | 0.005470951 |
| DUS4L     | 0.665547405            | 0.000889093 | 0.019448835 |
| TAPBP     | 0.665862716            | 0.000381544 | 0.012162452 |
| SMOX      | 0.665893486            | 0.000540272 | 0.014566311 |
| ARSD      | 1.499543458            | 0.001465272 | 0.025775423 |
| PRAF2     | 1.49991769             | 0.001714274 | 0.02794595  |
| ANAPC16   | 1.500500015            | 0.001410633 | 0.025109679 |
| TNIK      | 1.500597091            | 0.000258112 | 0.009925871 |
| CEP104    | 1.500860615            | 0.000390488 | 0.012272447 |
| NLRP1     | 1.502803797            | 0.000349924 | 0.011596681 |
| TMEM38B   | 1.503578301            | 0.000464026 | 0.013434938 |
| TAF12     | 1.503651257            | 0.001054925 | 0.021255886 |
| VPS13D    | 1.504172473            | 0.003023375 | 0.039422251 |
| AFF2      | 1.505698937            | 0.001180573 | 0.022663366 |
| ANO8      | 1.505782433            | 0.000161129 | 0.008138879 |
| NDST2     | 1.50588333             | 0.000567058 | 0.015007996 |
| HERC2     | 1.505970316            | 0.00280305  | 0.037856708 |
| NIT1      | 1.506057307            | 0.002814421 | 0.037895733 |
| LTA4H     | 1.506666383            | 0.000528292 | 0.014385694 |
| BCDIN3D   | 1.507307048            | 0.000973439 | 0.020431387 |

| GENE         | fold change (JQ1/DMSO) | p-value     | FDR         |
|--------------|------------------------|-------------|-------------|
| SESN1        | 1.507735471            | 0.001318122 | 0.024153707 |
| TMCC2        | 1.508261588            | 0.004282681 | 0.049075552 |
| PIK3R3       | 1.508327801            | 4.00146E-05 | 0.004347483 |
| ZNF2         | 1.508421898            | 0.003999589 | 0.047193214 |
| FAM195B      | 1.508780916            | 0.000364737 | 0.011866568 |
| DLGAP4       | 1.511879683            | 6.51945E-05 | 0.005201687 |
| SDC4         | 1.512141695            | 3.26561E-05 | 0.003997539 |
| ZCCHC2       | 1.512630905            | 0.000819445 | 0.018441233 |
| INPP5F       | 1.512816147            | 0.000268838 | 0.010137534 |
| LGMN         | 1.513053849            | 0.000592969 | 0.015395971 |
| TPRA1        | 1.514365378            | 0.000342204 | 0.011438873 |
| PARD6A       | 1.515103832            | 0.000533192 | 0.014454796 |
| VAT1         | 1.515173846            | 0.000349953 | 0.011596681 |
| FAM53C       | 1.515194851            | 0.000318895 | 0.011101607 |
| DYNLL2       | 1.515194851            | 0.000439185 | 0.013067582 |
| GTF3C1       | 1.515369903            | 0.000440353 | 0.013090585 |
| NXN          | 1.516588828            | 5.98573E-05 | 0.004983492 |
| LMLN         | 1.51801916             | 4.13134E-05 | 0.004363083 |
| PRRC2B       | 1.51825768             | 2.08056E-05 | 0.003622055 |
| ERV3-1       | 1.518629565            | 0.000777392 | 0.017940008 |
| ID1          | 1.520040749            | 9.83934E-05 | 0.006394617 |
| LRRC28       | 1.520072358            | 0.000467402 | 0.013480739 |
| EPHA2        | 1.520430636            | 1.11652E-05 | 0.002963198 |
| G6PD         | 1.520887387            | 0.000729161 | 0.017225867 |
| SKI          | 1.521590348            | 0.000368635 | 0.01195711  |
| NELL2        | 1.521607926            | 0.000720572 | 0.017110234 |
| DMXL2        | 1.522518755            | 0.000160954 | 0.008138879 |
| NRIP3        | 1.522652436            | 0.000123785 | 0.007216119 |
| HTT          | 1.523166161            | 0.000154612 | 0.008010587 |
| CCDC144A     | 1.523257665            | 0.001683894 | 0.027771561 |
| A1BG-AS1     | 1.524056795            | 2.25661E-05 | 0.003702475 |
| ERCC6L2      | 1.524342048            | 0.000183365 | 0.008541687 |
| ASCC1        | 1.52434557             | 0.000982476 | 0.020529001 |
| FAM220CP     | 1.524803497            | 0.0029611   | 0.038960809 |
| LOC100506720 | 1.525409581            | 0.002006634 | 0.030722357 |
| ZNF75A       | 1.525465973            | 1.34925E-05 | 0.003201006 |
| LRBA         | 1.52697171             | 6.74914E-05 | 0.005259719 |
| EIF2C1       | 1.527222222            | 0.000444115 | 0.013126854 |

(Continued)

| GENE      | fold change (JQ1/DMSO) | p-value     | FDR         |
|-----------|------------------------|-------------|-------------|
| HUWE1     | 1.527373961            | 0.000207793 | 0.009061273 |
| JAK1      | 1.527885749            | 0.00015005  | 0.007902977 |
| MAN1A1    | 1.528111696            | 0.000273683 | 0.010209303 |
| SEMA4F    | 1.531533227            | 0.002519278 | 0.035471672 |
| CTR9      | 1.531770331            | 0.000341526 | 0.011437601 |
| ZKSCAN1   | 1.532057028            | 0.00058336  | 0.015257567 |
| C3orf23   | 1.532318996            | 0.002095858 | 0.031530196 |
| KDM4C     | 1.532474782            | 0.000487211 | 0.013777711 |
| CYP2U1    | 1.533165387            | 7.74184E-05 | 0.005594262 |
| SLC27A4   | 1.533207896            | 0.000155237 | 0.008015355 |
| PCNX      | 1.533328345            | 0.000883847 | 0.019366254 |
| UBE2D3    | 1.534210741            | 0.001189541 | 0.022778436 |
| ZYG11B    | 1.535061724            | 0.003057454 | 0.039722936 |
| MALAT1    | 1.535778334            | 0.000449822 | 0.01322017  |
| MIB1      | 1.536115469            | 0.0004975   | 0.013936498 |
| PHLPP2    | 1.536406529            | 4.86978E-05 | 0.004656499 |
| EYA4      | 1.536537879            | 2.86857E-05 | 0.003810686 |
| TRAPPC9   | 1.536605334            | 3.03793E-05 | 0.003915497 |
| MSX2      | 1.53673315             | 0.001270069 | 0.023579394 |
| PELI1     | 1.536860978            | 6.03737E-05 | 0.004995458 |
| CLCN5     | 1.53690714             | 0.000289272 | 0.01055095  |
| EPS8      | 1.536924895            | 0.000195604 | 0.00875434  |
| CA8       | 1.537205454            | 0.002336031 | 0.03376037  |
| P4HA1     | 1.537716983            | 0.001249709 | 0.023453967 |
| CASP3     | 1.538061652            | 0.000303738 | 0.010871509 |
| ATF7IP2   | 1.538264224            | 0.001496028 | 0.026059952 |
| C10orf12  | 1.538264224            | 0.000127378 | 0.007312234 |
| KIAA1161  | 1.538736998            | 0.000608915 | 0.015599089 |
| SECISBP2L | 1.539092563            | 2.51358E-05 | 0.003800098 |
| AGRN      | 1.539341507            | 0.000264374 | 0.010060284 |
| GUSBP4    | 1.539430426            | 0.002997728 | 0.039237256 |
| BTD       | 1.540497848            | 0.002089149 | 0.03147342  |
| ANKRD50   | 1.540633107            | 0.00187483  | 0.029511618 |
| WDR44     | 1.540771939            | 0.000161208 | 0.008138879 |
| ENPP5     | 1.540789738            | 0.000420948 | 0.012750341 |
| ZXDC      | 1.541601628            | 0.001593093 | 0.026962395 |
| PCBP3     | 1.541744109            | 0.001652901 | 0.027508561 |
| ERC1      | 1.541904415            | 0.000398472 | 0.012390749 |

| GENE      | fold change (JQ1/DMSO) | p-value     | FDR         |
|-----------|------------------------|-------------|-------------|
| KLHDC2    | 1.544311016            | 0.000422301 | 0.012777942 |
| BCAS3     | 1.54460363             | 0.001658947 | 0.027520966 |
| KIF21A    | 1.544896298            | 0.000573025 | 0.015087487 |
| AKAP9     | 1.544978398            | 0.00169141  | 0.027834692 |
| CD24      | 1.545638926            | 0.000631721 | 0.016022226 |
| PYGB      | 1.546871476            | 6.42907E-05 | 0.005183571 |
| AMBRA1    | 1.547379072            | 0.000412318 | 0.012604611 |
| MIR3160-1 | 1.547994129            | 0.002573694 | 0.036020295 |
| AARD      | 1.548358988            | 0.003369792 | 0.042293572 |
| BTBD9     | 1.548978014            | 0.001713859 | 0.02794595  |
| PLEKHM1   | 1.548992329            | 0.003683853 | 0.044879787 |
| PITPNM1   | 1.549160548            | 1.49155E-05 | 0.00323775  |
| TOM1L2    | 1.549246455            | 4.34567E-05 | 0.004472203 |
| KCTD21    | 1.549976849            | 0.003691216 | 0.044879787 |
| USP25     | 1.55000908             | 0.000152261 | 0.007972439 |
| EIF5A2    | 1.550048474            | 3.96128E-05 | 0.004332831 |
| IL17RD    | 1.550610852            | 0.000608181 | 0.015599089 |
| SLC26A6   | 1.551370564            | 0.004365242 | 0.049671303 |
| RNF113A   | 1.551470932            | 0.000420378 | 0.012743388 |
| ARMCX3    | 1.551478101            | 0.001842541 | 0.029212804 |
| INPP4A    | 1.55250007             | 6.09346E-05 | 0.005034099 |
| ATG2B     | 1.553519123            | 0.000639758 | 0.016101958 |
| SH3RF1    | 1.553842201            | 0.000536566 | 0.014507846 |
| KLC2      | 1.554269487            | 0.000312622 | 0.010993665 |
| ZBED6     | 1.554926801            | 0.000715854 | 0.017051063 |
| ACOX1     | 1.554966321            | 8.62192E-05 | 0.005948537 |
| TTBK2     | 1.555976207            | 0.000321456 | 0.011115243 |
| VPS13A    | 1.557019127            | 0.000724144 | 0.017149483 |
| RNF123    | 1.557123457            | 0.001060477 | 0.02132768  |
| ATRN      | 1.557821571            | 0.000137464 | 0.007582724 |
| ZBED6     | 1.564472898            | 0.000784675 | 0.018019283 |
| NAP1L3    | 1.564805486            | 0.001370196 | 0.024694386 |
| NAP1L5    | 1.564921185            | 0.003487294 | 0.043251964 |
| KIAA1958  | 1.564968191            | 0.001035324 | 0.021065971 |
| TMEM175   | 1.567128339            | 0.000130028 | 0.007393119 |
| PIK3R1    | 1.568599088            | 2.61448E-05 | 0.003800098 |
| PSKH1     | 1.568762187            | 0.000879425 | 0.019312505 |
| TNFRSF12A | 1.56931685             | 1.44161E-05 | 0.00323775  |

(Continued)

| GENE         | fold change (JQ1/DMSO) | p-value     | FDR         |
|--------------|------------------------|-------------|-------------|
| LCMT2        | 1.570024059            | 0.000239325 | 0.009558746 |
| POTEG        | 1.570111122            | 0.00388201  | 0.04636706  |
| TBC1D24      | 1.572594449            | 0.000132611 | 0.007468702 |
| SGPP1        | 1.573499442            | 0.000278194 | 0.010327673 |
| DENND4A      | 1.574335842            | 0.000662563 | 0.016469467 |
| TEP1         | 1.574765124            | 0.000134334 | 0.00750002  |
| CIRBP        | 1.575154489            | 6.9372E-07  | 0.001586766 |
| RRNAD1       | 1.57728861             | 0.001837719 | 0.029160396 |
| HAGH         | 1.577325054            | 3.39689E-05 | 0.004065425 |
| USP20        | 1.578787133            | 0.000403123 | 0.01245227  |
| TRIM36       | 1.57901696             | 0.000855893 | 0.019023014 |
| GLS          | 1.579987707            | 0.000153146 | 0.00799833  |
| AASDH        | 1.581452254            | 0.00014975  | 0.007901048 |
| VPS39        | 1.581927337            | 0.000211548 | 0.009147233 |
| GLRB         | 1.582431811            | 0.000311077 | 0.01098026  |
| RABGAP1      | 1.58244278             | 0.000189716 | 0.008647792 |
| TOB1         | 1.583225404            | 0.00053951  | 0.014566311 |
| LOC100507556 | 1.583324174            | 0.000873285 | 0.019255822 |
| UBR4         | 1.584722244            | 0.000425361 | 0.012827098 |
| KIAA1109     | 1.584810122            | 0.001321105 | 0.024183574 |
| ARSK         | 1.585861376            | 4.28075E-05 | 0.004448081 |
| CCNYL1       | 1.585949317            | 3.80095E-05 | 0.004277602 |
| GREB1L       | 1.586165526            | 0.001164899 | 0.022500077 |
| KCTD11       | 1.588347594            | 0.000104917 | 0.006618041 |
| BBS2         | 1.590051323            | 0.00196415  | 0.030340487 |
| CYP2R1       | 1.591683327            | 0.000706319 | 0.016921674 |
| CLGN         | 1.592231379            | 0.00024871  | 0.009733638 |
| PAPD5        | 1.593460584            | 2.21352E-06 | 0.002210921 |
| INTS5        | 1.59390613             | 0.000125233 | 0.007226592 |
| FITM2        | 1.59429286             | 0.000721691 | 0.01711919  |
| MARCH2       | 1.594480735            | 0.001523676 | 0.026319245 |
| MFGE8        | 1.594576523            | 0.002754913 | 0.037418826 |
| MERTK        | 1.595092402            | 0.000371802 | 0.011994194 |
| ETHE1        | 1.595343032            | 0.003194339 | 0.040798207 |
| GDE1         | 1.595376206            | 1.15176E-05 | 0.002969775 |
| CTSL2        | 1.596198419            | 0.001204753 | 0.022927325 |
| MYO6         | 1.596515618            | 0.000234483 | 0.009452838 |
| IPO13        | 1.596611528            | 0.003497493 | 0.04333836  |

| GENE     | fold change (JQ1/DMSO) | p-value     | FDR         |
|----------|------------------------|-------------|-------------|
| FAM149B1 | 1.596891914            | 0.001394547 | 0.024943136 |
| TOR1B    | 1.597043195            | 0.000135239 | 0.007521898 |
| CCNDBP1  | 1.59719818             | 0.000445248 | 0.013145849 |
| RAB9A    | 1.597460214            | 0.000693871 | 0.016832731 |
| PARK2    | 1.597718599            | 0.002027646 | 0.030938047 |
| CKB      | 1.598039793            | 6.40366E-07 | 0.001586766 |
| PKP2     | 1.599277177            | 0.000199168 | 0.008867184 |
| TSPAN31  | 1.601492084            | 6.61736E-05 | 0.005214096 |
| RABIF    | 1.604128817            | 0.000165289 | 0.008255131 |
| GPR125   | 1.604974082            | 0.000204175 | 0.008994373 |
| TAOK2    | 1.60535608             | 0.000228838 | 0.009389169 |
| MPP7     | 1.605363498            | 0.000204259 | 0.008994373 |
| PCYOX1   | 1.606276215            | 0.000123016 | 0.007200599 |
| AGTPBP1  | 1.606673372            | 0.000919723 | 0.01984418  |
| AKAP13   | 1.609036069            | 0.000193433 | 0.008708058 |
| LPPR2    | 1.610036431            | 1.7994E-06  | 0.002083338 |
| CYP7B1   | 1.61035266             | 0.001117282 | 0.021999746 |
| C17orf51 | 1.610799206            | 0.000603578 | 0.015558674 |
| STIM2    | 1.611715014            | 0.000480228 | 0.013659621 |
| KIAA1033 | 1.612255063            | 6.44E-06    | 0.002575353 |
| NCOA3    | 1.612445054            | 1.57725E-05 | 0.003303415 |
| XPR1     | 1.613145608            | 2.00309E-05 | 0.003617099 |
| JMY      | 1.613872567            | 0.000673607 | 0.016599178 |
| ALKBH5   | 1.614077666            | 3.6298E-06  | 0.002289635 |
| SPRY2    | 1.61469312             | 0.000176459 | 0.008455051 |
| PTPRG    | 1.614715505            | 2.78852E-05 | 0.003810686 |
| TMEM50B  | 1.614939367            | 0.001042674 | 0.021138199 |
| SLC23A2  | 1.616130091            | 0.000133943 | 0.007499328 |
| KLHL7    | 1.617609453            | 0.000136274 | 0.007545515 |
| ABCD3    | 1.618521653            | 0.000368024 | 0.011951752 |
| EEFSEC   | 1.619004131            | 2.67907E-05 | 0.003800098 |
| TRIM66   | 1.619019094            | 0.00219845  | 0.032471525 |
| MARCH3   | 1.620145445            | 0.000178909 | 0.008500179 |
| CEND1    | 1.620239031            | 0.000332777 | 0.011292724 |
| PLA2G15  | 1.620512333            | 0.000715233 | 0.017051063 |
| TP53INP2 | 1.621193916            | 0.001022673 | 0.020939905 |
| CYR61    | 1.621272579            | 2.06676E-06 | 0.002172813 |
| PC       | 1.621478619            | 0.000773109 | 0.017874853 |

(Continued)

| GENE       | fold change (JQ1/DMSO) | p-value     | FDR         |
|------------|------------------------|-------------|-------------|
| H6PD       | 1.621606002            | 0.000507595 | 0.0140432   |
| CLTCL1     | 1.621875787            | 9.45379E-05 | 0.006234734 |
| PLXNA3     | 1.623086626            | 0.00267716  | 0.036833792 |
| METTL12    | 1.623217885            | 0.000227207 | 0.009352854 |
| ZZEF1      | 1.62355921             | 3.00328E-05 | 0.003908419 |
| HIST2H2AA4 | 1.624752536            | 0.001479407 | 0.025893494 |
| DENND4C    | 1.627220771            | 7.67663E-05 | 0.005572683 |
| ORAI3      | 1.627292206            | 0.000345208 | 0.011496284 |
| PRKAR2B    | 1.628349065            | 1.88647E-05 | 0.003549013 |
| PIM2       | 1.629259793            | 0.000501981 | 0.013986545 |
| METTL23    | 1.630174797            | 0.000257661 | 0.009925871 |
| OAT        | 1.630687122            | 0.000135981 | 0.007542254 |
| CASP9      | 1.631320216            | 0.000686207 | 0.016746637 |
| CSGALNACT2 | 1.631527532            | 0.000518211 | 0.014224475 |
| TGFB1      | 1.632300489            | 0.000150627 | 0.007925582 |
| PTGER2     | 1.632311804            | 0.0012602   | 0.023526352 |
| RAD54L2    | 1.632753122            | 2.67175E-06 | 0.002229464 |
| RAB3A      | 1.635067279            | 0.000882053 | 0.019342755 |
| CCDC87     | 1.635520678            | 0.001033433 | 0.021041232 |
| LCOR       | 1.638679068            | 0.000503165 | 0.013992841 |
| MOAP1      | 1.638785084            | 0.001689142 | 0.027823879 |
| AMIGO1     | 1.640311713            | 0.000804674 | 0.018265964 |
| WDR7       | 1.640387513            | 5.12837E-05 | 0.004724533 |
| BCORL1     | 1.640868926            | 0.000795391 | 0.018139719 |
| PMAIP1     | 1.641168459            | 5.3092E-05  | 0.004772128 |
| ULK1       | 1.641240507            | 0.000354803 | 0.011692362 |
| ALDOC      | 1.641653895            | 0.000376032 | 0.012072879 |
| TRAF4      | 1.642814971            | 0.000194428 | 0.008731084 |
| STRADA     | 1.642837746            | 6.82095E-05 | 0.005307966 |
| ABCC5      | 1.644163001            | 0.001354754 | 0.024539813 |
| SEMA6C     | 1.645284035            | 0.000596079 | 0.015417254 |
| YPEL5      | 1.648766008            | 0.000178588 | 0.008500179 |
| KIF3A      | 1.651533996            | 0.000207559 | 0.009061273 |
| GNPTAB     | 1.65159505             | 0.003671819 | 0.044814914 |
| PIGZ       | 1.652828077            | 0.000358699 | 0.011742581 |
| MAPT       | 1.654214898            | 0.001621385 | 0.027257236 |
| SAMD4A     | 1.655273945            | 0.001652048 | 0.027508561 |
| KIAA0913   | 1.657593212            | 0.000840742 | 0.018776995 |

| GENE         | fold change (JQ1/DMSO) | p-value     | FDR         |
|--------------|------------------------|-------------|-------------|
| ATP10D       | 1.659892717            | 0.000341792 | 0.011438873 |
| UBR3         | 1.660383691            | 0.000864945 | 0.019128163 |
| MLL3         | 1.661565693            | 2.7937E-05  | 0.003810686 |
| KIAA1919     | 1.664036025            | 0.000371087 | 0.011994194 |
| DNAJC6       | 1.664351323            | 3.59339E-05 | 0.004153722 |
| C4orf32      | 1.664924397            | 5.69011E-05 | 0.004873588 |
| SCAND3       | 1.66505904             | 0.001377103 | 0.024777225 |
| NOP14-AS1    | 1.66545149             | 0.000579219 | 0.015186301 |
| TPI1P2       | 1.667966138            | 0.001803341 | 0.028845386 |
| TSPAN7       | 1.669512236            | 0.001780686 | 0.028679796 |
| GJA3         | 1.673493948            | 0.000442523 | 0.013101466 |
| GADD45B      | 1.674066301            | 0.0001707   | 0.008305283 |
| FBXO33       | 1.674542122            | 0.000141239 | 0.007664789 |
| MAPRE3       | 1.674867151            | 4.48842E-05 | 0.004589186 |
| SLC16A10     | 1.674867151            | 0.000306381 | 0.010907855 |
| GDPD1        | 1.675331587            | 0.004001372 | 0.047197196 |
| C6orf226     | 1.676225989            | 0.004057566 | 0.047573697 |
| KAT2B        | 1.677500659            | 0.000122923 | 0.007200599 |
| CTC1         | 1.678248865            | 0.000392347 | 0.012302029 |
| RN7SKP4      | 1.678543587            | 8.40434E-05 | 0.005852149 |
| TTC12        | 1.678679331            | 0.001783895 | 0.028688262 |
| SLC22A17     | 1.679773445            | 0.000101613 | 0.006524772 |
| RFX3         | 1.680153836            | 0.000455868 | 0.013283845 |
| MLLT4        | 1.680755651            | 0.000247759 | 0.009717699 |
| LOC100506730 | 1.681276103            | 0.000319332 | 0.011103517 |
| TECPR2       | 1.681952154            | 0.000439117 | 0.013067582 |
| MFSD9        | 1.68269457             | 0.000621244 | 0.015833019 |
| ASNS         | 1.683289516            | 9.80012E-07 | 0.001684565 |
| WDR26        | 1.685126232            | 4.13855E-05 | 0.004363083 |
| SLC17A5      | 1.687046805            | 0.000747835 | 0.01750182  |
| SLC7A5       | 1.687167644            | 2.80812E-05 | 0.003810686 |
| C5orf42      | 1.687861664            | 0.000470483 | 0.013518696 |
| KDM4B        | 1.687959162            | 0.000186093 | 0.008594099 |
| LRP6         | 1.689273978            | 0.000358736 | 0.011742581 |
| GXYLT2       | 1.690882801            | 7.94567E-06 | 0.002661222 |
| LOC100134229 | 1.69157444             | 0.00261724  | 0.036346494 |
| MMP15        | 1.697302056            | 0.003549515 | 0.043831033 |
| MAP1A        | 1.698114022            | 0.003177853 | 0.040626358 |

(Continued)



| GENE         | fold change (JQ1/DMSO) | p-value     | FDR         |
|--------------|------------------------|-------------|-------------|
| KIF5C        | 1.698785069            | 0.002180183 | 0.032282483 |
| NFAT5        | 1.699511354            | 2.01578E-05 | 0.003617099 |
| IRS2         | 1.700194738            | 0.000417052 | 0.012680208 |
| HOMER1       | 1.700253663            | 0.000116909 | 0.007021906 |
| ACVR1C       | 1.702101023            | 0.001648911 | 0.02749325  |
| ALDH3A2      | 1.702750041            | 0.00046008  | 0.013362174 |
| HIFX         | 1.705407689            | 0.00030032  | 0.010792398 |
| OGDH         | 1.705659889            | 1.17065E-05 | 0.002969775 |
| BAIAP2       | 1.70656654             | 4.87495E-05 | 0.004656499 |
| CNNM3        | 1.707359268            | 6.40868E-06 | 0.002575353 |
| FRRS1L       | 1.71151033             | 0.000604592 | 0.015569996 |
| ROBO1        | 1.71186231             | 0.000417484 | 0.012680208 |
| KIAA0319L    | 1.712428003            | 0.000187662 | 0.008647792 |
| DGCR2        | 1.71344118             | 8.82294E-05 | 0.006033923 |
| WNK3         | 1.713504523            | 0.001498584 | 0.026095998 |
| SLC12A6      | 1.713999474            | 3.14642E-05 | 0.003996833 |
| SYNM         | 1.714161849            | 0.000156886 | 0.008049528 |
| ZNF554       | 1.717686401            | 0.001660577 | 0.02753858  |
| USP53        | 1.718412826            | 0.000905545 | 0.019617215 |
| FBXW5        | 1.719052176            | 9.43418E-06 | 0.00285781  |
| PTPN13       | 1.725705959            | 0.000737079 | 0.017340924 |
| RDH10        | 1.725885394            | 0.00020991  | 0.00909107  |
| APLP2        | 1.727317551            | 1.83398E-05 | 0.003510063 |
| AHR          | 1.733594723            | 0.000139928 | 0.007661461 |
| LOC100132273 | 1.737002704            | 0.001518978 | 0.026303415 |
| FAM173A      | 1.742964679            | 0.002483053 | 0.035155493 |
| SIPA1L2      | 1.745322127            | 0.002087997 | 0.031464906 |
| PLD3         | 1.745447141            | 2.43225E-05 | 0.003758137 |
| PPM1L        | 1.745467305            | 0.000833952 | 0.018677529 |
| SOCS1        | 1.746286173            | 0.00172683  | 0.028090851 |
| FAM102A      | 1.747501063            | 0.002576548 | 0.03604706  |
| MT1P3        | 1.748219901            | 0.000103835 | 0.006565237 |
| TIAM1        | 1.750802885            | 4.16316E-05 | 0.004363083 |
| AHCYL2       | 1.755972194            | 1.1657E-05  | 0.002969775 |
| PGPEP1       | 1.75744556             | 0.001274039 | 0.02363673  |
| SLC2A13      | 1.758119743            | 3.51324E-05 | 0.004086104 |
| MYO9A        | 1.758140053            | 0.002100875 | 0.031561394 |
| ADI1         | 1.763371767            | 4.87508E-06 | 0.002398047 |

| GENE     | fold change (JQ1/DMSO) | p-value     | FDR         |
|----------|------------------------|-------------|-------------|
| SLC25A4  | 1.763705888            | 0.000208187 | 0.009061273 |
| ZC3H10   | 1.76469232             | 0.000400458 | 0.012423887 |
| MTHFR    | 1.764810566            | 0.003155876 | 0.040480527 |
| GLCC1    | 1.767066908            | 0.000467248 | 0.013480739 |
| ERCC6    | 1.767189396            | 8.28106E-06 | 0.00268001  |
| SRXN1    | 1.767262893            | 4.54251E-06 | 0.002376493 |
| FBXL20   | 1.76747115             | 0.000126818 | 0.007287889 |
| CNKSR3   | 1.767679433            | 0.001347068 | 0.024491353 |
| POTEM    | 1.773886045            | 0.000277603 | 0.010321942 |
| CPT2     | 1.777960574            | 0.002806695 | 0.037872472 |
| N6AMT1   | 1.781830371            | 0.000201932 | 0.008941509 |
| SYNJ1    | 1.782015641            | 0.000160352 | 0.008133958 |
| SLC30A4  | 1.782200931            | 0.000173674 | 0.00838908  |
| MGC12916 | 1.78307411             | 0.001475986 | 0.025870527 |
| KDM5B    | 1.78725233             | 5.68609E-05 | 0.004873588 |
| VGF      | 1.78962833             | 0.000594969 | 0.015395971 |
| ALAD     | 1.791022341            | 0.000658078 | 0.016418878 |
| EFTUD1   | 1.791154766            | 0.001843724 | 0.029212804 |
| SLC12A2  | 1.794223982            | 2.95628E-06 | 0.002230648 |
| KIF1B    | 1.794692488            | 0.000147599 | 0.007848115 |
| HSPA4L   | 1.795526153            | 0.000123573 | 0.007216119 |
| ZCCHC24  | 1.796144392            | 2.76887E-05 | 0.003810686 |
| PIK3C2B  | 1.796156842            | 0.002593077 | 0.036131239 |
| SEMA6A   | 1.797688847            | 0.003755775 | 0.045302518 |
| NXF1     | 1.798827278            | 0.000188261 | 0.008647792 |
| RGL1     | 1.80078174             | 2.33332E-05 | 0.003745677 |
| FAM214A  | 1.802813302            | 3.61533E-05 | 0.004153722 |
| BRD2     | 1.802913274            | 2.39533E-05 | 0.003758137 |
| PAIP2B   | 1.811146607            | 0.00082927  | 0.018619334 |
| SLAIN1   | 1.812029781            | 0.000142735 | 0.00771474  |
| C1orf38  | 1.817069162            | 0.001343665 | 0.024446314 |
| ACER2    | 1.818043434            | 0.000478906 | 0.013636486 |
| TEC      | 1.82026269             | 0.003036713 | 0.039548079 |
| RHPN2    | 1.823870545            | 0.000132412 | 0.007465336 |
| EGR1     | 1.824232988            | 0.000242118 | 0.009608913 |
| VPS8     | 1.827249113            | 0.000747257 | 0.01749593  |
| CEP19    | 1.829073859            | 0.000356305 | 0.011698947 |
| TXNRD1   | 1.839308316            | 3.71755E-05 | 0.004222964 |

(Continued)

| GENE      | fold change (JQ1/DMSO) | p-value     | FDR         |
|-----------|------------------------|-------------|-------------|
| FAM8A1    | 1.847716393            | 0.00012992  | 0.007393119 |
| FAM171B   | 1.848019526            | 1.23412E-05 | 0.003021453 |
| ABTB2     | 1.848412392            | 9.15073E-06 | 0.002836039 |
| C7orf43   | 1.848438017            | 4.06231E-05 | 0.004347483 |
| BCL2L11   | 1.84850208             | 0.000384526 | 0.012171722 |
| CDON      | 1.850095829            | 0.000116951 | 0.007021906 |
| MAP6D1    | 1.850702926            | 0.004065516 | 0.047601699 |
| PLEKHH1   | 1.851057871            | 6.4198E-05  | 0.005183571 |
| NEFL      | 1.851442828            | 0.000230753 | 0.009428262 |
| TCP11L2   | 1.851973344            | 0.000134751 | 0.007507549 |
| C11orf67  | 1.853480153            | 0.002727416 | 0.037162862 |
| ITFG3     | 1.857608742            | 0.001161713 | 0.022470262 |
| TERF2IP   | 1.857685999            | 1.17116E-05 | 0.002969775 |
| CPM       | 1.869164229            | 0.000448185 | 0.013198821 |
| SLC41A2   | 1.873782282            | 4.40478E-06 | 0.002367448 |
| C12orf51  | 1.874825947            | 3.28057E-06 | 0.002255055 |
| MLYCD     | 1.878272867            | 0.000103585 | 0.00656324  |
| PLCG2     | 1.881191432            | 2.40303E-05 | 0.003758137 |
| HEATR5A   | 1.883278898            | 3.61266E-06 | 0.002289635 |
| EXOC6B    | 1.884079707            | 5.07218E-05 | 0.00471326  |
| EVI5      | 1.886667252            | 4.10199E-07 | 0.001586766 |
| MYCBP2    | 1.887626504            | 0.000552766 | 0.014789249 |
| CALN1     | 1.887635227            | 0.000168591 | 0.008281033 |
| BRD2      | 1.894867101            | 2.06456E-05 | 0.003622055 |
| RN5S139   | 1.897237119            | 0.00380802  | 0.04577906  |
| ZSWIM5    | 1.902434346            | 0.000247645 | 0.009717699 |
| BRD2      | 1.903063015            | 3.2426E-05  | 0.003996833 |
| EPB41L5   | 1.905606184            | 2.86137E-05 | 0.003810686 |
| GSTT2     | 1.910654162            | 0.003569819 | 0.04399026  |
| ABCC10    | 1.911842044            | 0.000154431 | 0.008010587 |
| CACHD1    | 1.918656792            | 4.90177E-05 | 0.004656499 |
| SLC25A30  | 1.920692636            | 0.000286091 | 0.010499642 |
| C14orf118 | 1.930047919            | 0.000174702 | 0.008408435 |
| BRD2      | 1.930877537            | 1.11455E-05 | 0.002963198 |
| DPP3      | 1.936068503            | 0.000140039 | 0.007661461 |
| FAM89B    | 1.937410949            | 0.000106515 | 0.006656194 |
| ZNF468    | 1.93850797             | 0.000169879 | 0.008283632 |
| BEND6     | 1.939991054            | 0.003875691 | 0.046301899 |

| GENE         | fold change (JQ1/DMSO) | p-value     | FDR         |
|--------------|------------------------|-------------|-------------|
| ZFYVE1       | 1.945206521            | 4.57311E-05 | 0.004592806 |
| ACADSB       | 1.945296411            | 0.000130785 | 0.007419777 |
| HIST2H4B     | 1.946069634            | 0.0015725   | 0.026725721 |
| GSTT2B       | 1.948031041            | 0.000325031 | 0.011178439 |
| LOC100129033 | 1.952902604            | 0.000721907 | 0.01711919  |
| REEP6        | 1.955548522            | 0.00066763  | 0.016518836 |
| SERINC5      | 1.964238345            | 3.03662E-05 | 0.003915497 |
| AMIGO3       | 1.973336057            | 0.001517066 | 0.026303415 |
| EPHX1        | 1.981404362            | 1.67267E-05 | 0.003403309 |
| SERPINB9     | 1.982306437            | 0.001098923 | 0.021766007 |
| ZKSCAN2      | 1.984611566            | 0.000333871 | 0.011322683 |
| CAPN5        | 1.984905055            | 5.60774E-05 | 0.004873588 |
| FAM59A       | 1.991276185            | 0.000267596 | 0.010125402 |
| DENND2C      | 1.99943632             | 0.000441221 | 0.013090585 |
| MGAT4A       | 2.001137084            | 0.000134268 | 0.00750002  |
| KDM1B        | 2.004084492            | 3.7162E-06  | 0.002307559 |
| HERC1        | 2.009360841            | 0.000310243 | 0.010972493 |
| ERO1LB       | 2.010113085            | 0.000523052 | 0.014293822 |
| MRPS17       | 2.010410345            | 0.000715129 | 0.017051063 |
| RETSAT       | 2.012645848            | 1.30501E-05 | 0.003151834 |
| SLFN5        | 2.014814008            | 4.15599E-06 | 0.002359839 |
| SORBS1       | 2.015614863            | 0.000572994 | 0.015087487 |
| RALGAP1      | 2.017003145            | 2.36811E-05 | 0.003758137 |
| ZDBF2        | 2.017320068            | 0.000114976 | 0.006981504 |
| TMEM106A-AS1 | 2.018583594            | 0.001810044 | 0.028909481 |
| GMPR         | 2.02809233             | 0.000234015 | 0.009450269 |
| SESN2        | 2.02824697             | 0.000799162 | 0.018182987 |
| ZER1         | 2.033361415            | 1.97981E-05 | 0.003598355 |
| JHDM1D       | 2.038931537            | 0.001387197 | 0.024897217 |
| GATM         | 2.040156747            | 4.59492E-05 | 0.004592806 |
| TOB2P1       | 2.040637608            | 0.000383629 | 0.012171722 |
| SPATA7       | 2.047514024            | 0.000705899 | 0.016919172 |
| ARRDC3       | 2.047698532            | 1.85787E-07 | 0.001272452 |
| PAG1         | 2.053706475            | 0.000456842 | 0.013304996 |
| B3GALT1      | 2.054650961            | 0.000363305 | 0.011841534 |
| JUP          | 2.060960231            | 1.44221E-06 | 0.002083338 |
| LOC653562    | 2.061684157            | 0.00202439  | 0.030905956 |
| MXD1         | 2.06665848             | 7.21654E-06 | 0.002575353 |

(Continued)

| GENE         | fold change (JQ1/DMSO) | p-value     | FDR         |
|--------------|------------------------|-------------|-------------|
| FOS          | 2.069147751            | 0.000946949 | 0.020147843 |
| KLHL24       | 2.070893459            | 3.26285E-05 | 0.003997539 |
| ADARB1       | 2.081244799            | 0.000101341 | 0.006515108 |
| DYRK1B       | 2.085683143            | 0.000586105 | 0.015299509 |
| TLCD1        | 2.086333803            | 0.000159184 | 0.008103391 |
| NEU1         | 2.086550734            | 2.69324E-05 | 0.003810117 |
| SLC9A1       | 2.086926803            | 5.44373E-05 | 0.004815292 |
| CDKN1A       | 2.092953124            | 0.000501651 | 0.013986545 |
| WDR47        | 2.094583406            | 3.39176E-06 | 0.002255733 |
| PNPLA8       | 2.099724431            | 1.1219E-05  | 0.002963198 |
| DNAJC28      | 2.100253299            | 0.000304288 | 0.010876673 |
| LOC100506670 | 2.105777977            | 0.002312988 | 0.033608531 |
| ODZ1         | 2.105831496            | 0.002119047 | 0.031735919 |
| ZFP36        | 2.108665124            | 0.000745459 | 0.017469089 |
| SYN1         | 2.114568554            | 0.001296315 | 0.023881594 |
| GLCE         | 2.120562003            | 2.14038E-05 | 0.003631669 |
| ENC1         | 2.126611748            | 1.73219E-06 | 0.002083338 |
| SPTAN1       | 2.130738186            | 1.47875E-05 | 0.00323775  |
| NEU1         | 2.134433675            | 1.93551E-05 | 0.003557359 |
| POLR2A       | 2.138219557            | 2.35107E-05 | 0.003751706 |
| NEU1         | 2.140216385            | 5.91525E-05 | 0.004947862 |
| JUND         | 2.142784353            | 5.6357E-05  | 0.004873588 |
| DOPEY2       | 2.146307324            | 1.59933E-05 | 0.003326561 |
| TNFSF9       | 2.14749782             | 0.000159896 | 0.008126203 |
| SLC9A3R1     | 2.149697011            | 2.53187E-05 | 0.003800098 |
| TARSL2       | 2.151754272            | 0.000702636 | 0.016889235 |
| ROPN1L       | 2.156841259            | 0.000917909 | 0.019828979 |
| KCTD13       | 2.16298451             | 2.59257E-06 | 0.002229464 |
| MAP3K9       | 2.164009251            | 0.001330455 | 0.024296664 |
| NUDT7        | 2.166250376            | 9.29344E-05 | 0.006170138 |
| CDO1         | 2.166986251            | 0.000464748 | 0.013440342 |
| UNC13B       | 2.168012889            | 0.000107167 | 0.006677776 |
| PNMA1        | 2.169035001            | 5.81677E-05 | 0.004942595 |
| ATF3         | 2.169435961            | 0.00393569  | 0.046747896 |
| GDF11        | 2.177189022            | 6.63225E-05 | 0.005214096 |
| EDEM2        | 2.179655301            | 0.000265168 | 0.01006906  |
| NBEA         | 2.182648783            | 0.000111189 | 0.006820144 |
| ABCB1        | 2.198927441            | 0.000792137 | 0.018139719 |

| GENE      | fold change (JQ1/DMSO) | p-value     | FDR         |
|-----------|------------------------|-------------|-------------|
| RSPH3     | 2.202690302            | 5.20917E-05 | 0.004750001 |
| KIAA0513  | 2.211205843            | 0.000228876 | 0.009389169 |
| PNPLA2    | 2.21187522             | 3.12978E-05 | 0.003985972 |
| HOXA1     | 2.236108202            | 1.34015E-05 | 0.003200149 |
| TM7SF2    | 2.244929284            | 0.000251282 | 0.009765637 |
| BRD2      | 2.248537067            | 1.36065E-06 | 0.002083338 |
| ATP8A1    | 2.251557518            | 0.002492951 | 0.035248831 |
| BAMBI     | 2.257553222            | 0.000268149 | 0.010132026 |
| GATS      | 2.260157535            | 0.001110299 | 0.021915894 |
| LIFR      | 2.271224001            | 0.000115739 | 0.006996142 |
| RALGAPA2  | 2.274737388            | 2.61435E-05 | 0.003800098 |
| NPTXR     | 2.277251029            | 5.3306E-05  | 0.004772128 |
| GATSL1    | 2.279540961            | 5.69438E-06 | 0.002522548 |
| TBC1D8    | 2.284534136            | 6.72935E-05 | 0.005259719 |
| ZSWIM6    | 2.285236271            | 8.72301E-06 | 0.002767465 |
| HIST2H2BC | 2.288300733            | 0.000245252 | 0.009685506 |
| GCH1      | 2.310230284            | 3.70578E-05 | 0.004218531 |
| HIF0      | 2.314408189            | 0.000105071 | 0.006619967 |
| ELOVL4    | 2.346873369            | 7.6274E-07  | 0.001586766 |
| SAMHD1    | 2.34707943             | 8.31558E-07 | 0.001647978 |
| IRF7      | 2.358113784            | 0.000130704 | 0.007419777 |
| C4orf34   | 2.367120802            | 0.000654547 | 0.016376503 |
| HIST2H2BF | 2.370207447            | 0.000944873 | 0.020127634 |
| FNBP1     | 2.384863454            | 1.78826E-06 | 0.002083338 |
| CITED2    | 2.398423903            | 2.48424E-06 | 0.002229464 |
| ERN1      | 2.402722441            | 0.000581749 | 0.015237731 |
| CXADR     | 2.437282252            | 0.002911311 | 0.038650357 |
| INA       | 2.450257435            | 3.17039E-05 | 0.003996833 |
| CNNM4     | 2.455669943            | 7.56624E-05 | 0.005549646 |
| PNRC1     | 2.4689883              | 5.79759E-05 | 0.00493696  |
| C14orf37  | 2.472207777            | 3.24262E-05 | 0.003996833 |
| TESK2     | 2.473927691            | 0.000129588 | 0.007383762 |
| RORB      | 2.474682316            | 2.19823E-05 | 0.003661641 |
| DGAT1     | 2.49901576             | 2.89555E-06 | 0.002229464 |
| DLX2      | 2.509946593            | 8.87669E-06 | 0.002799656 |
| SHISA2    | 2.530063042            | 5.31054E-05 | 0.004772128 |
| CTH       | 2.567652563            | 7.1101E-06  | 0.002575353 |

(Continued)

| GENE      | fold change (JQ1/DMSO) | p-value     | FDR         |
|-----------|------------------------|-------------|-------------|
| MKNK2     | 2.576388219            | 9.76118E-06 | 0.002909054 |
| FLNC      | 2.586724965            | 3.03387E-05 | 0.003915497 |
| ITPR1     | 2.598045445            | 9.88347E-06 | 0.002911659 |
| CLU       | 2.644551981            | 0.000671873 | 0.01658555  |
| ANGPTL4   | 2.647339707            | 1.45441E-05 | 0.00323775  |
| MIDN      | 2.656806824            | 7.30513E-07 | 0.001586766 |
| ATP1B2    | 2.713917127            | 0.000793473 | 0.018139719 |
| IL11      | 2.785436319            | 1.55394E-05 | 0.003303415 |
| GPR50     | 2.790035219            | 7.34245E-06 | 0.002575353 |
| TP53INP1  | 2.797458379            | 0.000429854 | 0.012882885 |
| CHMP1B    | 2.825618447            | 4.26669E-05 | 0.00444208  |
| TMEM2     | 2.865261208            | 3.54202E-06 | 0.002288102 |
| SERTAD1   | 2.870761212            | 4.21391E-06 | 0.002359839 |
| HIST2H4B  | 2.885630679            | 1.02479E-05 | 0.002925673 |
| HIST2H4B  | 2.885630679            | 1.02479E-05 | 0.002925673 |
| TMEM47    | 3.244058869            | 0.000252685 | 0.009803337 |
| DCXR      | 3.296556939            | 1.4402E-05  | 0.00323775  |
| HIST2H4B  | 3.315768612            | 0.000558348 | 0.014886596 |
| SLIT2     | 3.381078081            | 0.001782085 | 0.028685095 |
| EFR3B     | 3.392863368            | 8.69909E-06 | 0.002767465 |
| LINC00052 | 3.417615274            | 0.001043959 | 0.021138199 |
| TEX14     | 3.459803255            | 0.000116725 | 0.007021906 |
| HIST1H2BD | 3.54615763             | 0.000183922 | 0.00854536  |
| PEG10     | 3.571747266            | 3.06944E-06 | 0.002230648 |
| HIST1H2AH | 3.636145676            | 3.46836E-05 | 0.004083199 |
| DHRS2     | 3.664111316            | 9.5058E-05  | 0.006261333 |
| LOC729974 | 3.70070465             | 7.69119E-05 | 0.005572683 |
| SERPINI1  | 3.854668159            | 0.000226396 | 0.009352854 |
| HEXIM1    | 3.912290051            | 5.7398E-06  | 0.002522548 |
| HIST1H2BC | 4.593604556            | 0.000304241 | 0.010876673 |
| HIST2H2BE | 4.597724433            | 3.19589E-05 | 0.003996833 |
| HIST1H2BC | 5.014896757            | 6.56385E-06 | 0.002575353 |
| FAM46C    | 5.410880327            | 8.09033E-06 | 0.002661222 |
| SESN3     | 5.861134726            | 0.000874637 | 0.019274728 |

**Supplementary Table S2.** Summary statistics of cell cycle analysis in multiple medulloblastoma cell lines.

| Cells/Treatments | G1                 | S              | G2/M           |
|------------------|--------------------|----------------|----------------|
| Daoy DMSO        | 50.67 ± 3.19       | 15.39 ± 1.73   | 33.94 ± 1.46   |
| Daoy JQ1 300nM   | 79.416 ± 0.273 (*) | 3.736 ± 0.421  | 16.813 ± 0.238 |
| D283 DMSO        | 23.47 ± 0.29       | 19.88 ± 1.26   | 55.70 ± 1.50   |
| D283 JQ1 300nM   | 30.373 ± 0.493 (*) | 14.093 ± 0.655 | 53.216 ± 0.384 |
| D425 DMSO        | 33.715 ± 0.495     | 28.96 ± 0.89   | 37 ± 0.47      |
| D425 JQ1 300nM   | 39.393 ± 0.796 (*) | 28.636 ± 1.582 | 31 ± 0.83      |
| D458 DMSO        | 35.85 ± 1.37       | 43.54 ± 3.48   | 18.72 ± 2.62   |
| D458 JQ1 300nM   | 46.86 ± 1.96 (**)  | 26.58 ± 1.57   | 23.266 ± 2.52  |

\*P < 0.01 and \*\*P < 0.05 increase in G1 for cell lines treated with 300 nM JQ1 vs. their respective DMSO treated control
